# Supplementary material
Source: publisher figshare collection journal article supplement (https://rs.figshare.com/ndownloader/files/17842475)
Supplement: Supplementary file 1 [file 17842475]

50	0.8	0.3	1	1	0.03	0.04	0.4	0.1	5	1	1227.3	0.0104
50	0.99	0.3	1	1	0.03	0.04	0.4	0	5	1	666.1	0.0005
50	0.99	0.4	1	1	0.03	0.04	0.4	0	5	1	762.96	0.0006
50	0.99	0.2	1	1	0.03	0.04	0.4	0	5	1	639.76	0.0009
50	0.99	0.5	1	1	0.03	0.04	0.4	0	5	1	856.01	0.0007
50	0.99	0.4	1	1	0.03	0.04	0.4	0.1	5	1	948.98	0.0006
50	0.99	0.5	1	1	0.03	0.04	0.4	0.1	5	1	1017.8	0.001
50	0.9	0.4	1	1	0.03	0.04	0.4	0	5	1	1000.7	0.0028
50	0.99	0.3	1	1	0.03	0.04	0.4	0.1	5	1	850.42	0.001
50	0.99	0.1	1	1	0.03	0.04	0.4	0	5	1	653.26	0.0012
50	0.99	0.6	1	1	0.03	0.04	0.4	0	5	1	1138.9	0.0005
50	0.99	0.5	1	1	0.03	0.04	0.4	0.2	5	1	1115.3	0.0011
50	0.99	0.6	1	1	0.03	0.04	0.4	0.2	5	1	1377.4	0.0011
50	0.9	0.3	1	1	0.03	0.04	0.4	0	5	1	922.53	0.0022
50	0.99	0.4	1	1	0.03	0.04	0.4	0.2	5	1	1042	0.0014
50	0.8	0.6	1	1	0.03	0.04	0.4	0.8	5	1	2845.7	0.0337
50	0.9	0.5	1	1	0.03	0.04	0.4	0	5	1	1193.9	0.0021
50	0.9	0.2	1	1	0.03	0.04	0.4	0	5	1	882.61	0.0031
50	0.8	0.6	1	1	0.03	0.04	0.4	0.9	5	1	2850.1	0.0363
50	0.99	0.2	1	1	0.03	0.04	0.4	0.1	5	1	858.59	0.0016
50	0.99	0.01	1	1	0.03	0.04	0.4	0	5	1	597.3	0.001
50	0.99	0.1	1	1	0.03	0.04	0.4	0.1	5	1	887.88	0.0033
50	0.99	0.6	1	1	0.03	0.04	0.4	0.1	5	1	1216.9	0.0003
50	0.9	0.3	1	1	0.03	0.04	0.4	0.1	5	1	1070	0.0055
50	0.99	0.3	1	1	0.03	0.04	0.4	0.2	5	1	1027	0.0016
50	0.9	0.1	1	1	0.03	0.04	0.4	0	5	1	854.08	0.0047
50	0.8	0.1	1	1	0.03	0.04	0.4	0.1	5	1	1275	0.0198
50	0.9	0.4	1	1	0.03	0.04	0.4	0.1	5	1	1256.5	0.005
50	0.8	0.2	1	1	0.03	0.04	0.4	0.1	5	1	1264.6	0.0123
50	0.99	0.2	1	1	0.03	0.04	0.4	0.2	5	1	1019.5	0.0063
50	0.99	0.5	1	1	0.03	0.04	0.4	0.3	5	1	1365.7	0.0033
50	0.8	0.3	1	1	0.03	0.04	0.4	0	5	1	1176.4	0.0064
50	0.9	0.5	1	1	0.03	0.04	0.4	0.1	5	1	1374.7	0.0041
50	0.9	0.2	1	1	0.03	0.04	0.4	0.1	5	1	1029.1	0.0074
50	0.99	0.7	1	1	0.03	0.04	0.4	0	5	1	1590.1	0.0005
50	0.99	0.1	1	1	0.03	0.04	0.4	0.3	5	1	1527	0.0308
50	0.9	0.6	1	1	0.03	0.04	0.4	0	5	1	1467.8	0.0032
50	0.8	0.4	1	1	0.03	0.04	0.4	0	5	1	1319.9	0.0053
50	0.99	0.3	1	1	0.03	0.04	0.4	0.3	5	1	1265.3	0.0076
50	0.99	0.6	1	1	0.03	0.04	0.4	0.3	5	1	1500.1	0.0014
50	0.99	0.7	1	1	0.03	0.04	0.4	0.1	5	1	1700.4	0.001
50	0.99	0.4	1	1	0.03	0.04	0.4	0.3	5	1	1252.6	0.004
50	0.7	0.6	1	1	0.03	0.04	0.4	0.1	5	1	2031.6	0.0164
50	0.9	0.3	1	1	0.03	0.04	0.4	0.2	5	1	1202.2	0.0093
50	0.9	0.4	1	1	0.03	0.04	0.4	0.2	5	1	1434.5	0.0069
50	0.99	0.5	1	1	0.03	0.04	0.4	0.4	5	1	1625.8	0.0058
50	0.7	0.1	1	1	0.03	0.04	0.4	0.1	5	1	1377.6	0.0284
50	0.99	0.6	1	1	0.03	0.04	0.4	0.4	5	1	1809	0.0028
50	0.99	0.7	1	1	0.03	0.04	0.4	0.3	5	1	2112.8	0.0019
50	0.8	0.5	1	1	0.03	0.04	0.4	0.1	5	1	1597.9	0.0082
50	0.8	0.5	1	1	0.03	0.04	0.4	0	5	1	1629.9	0.0072
50	0.9	0.6	1	1	0.03	0.04	0.4	0.1	5	1	1709.9	0.0037
50	0.9	0.5	1	1	0.03	0.04	0.4	0.2	5	1	1568.2	0.0063
50	0.8	0.4	1	1	0.03	0.04	0.4	0.1	5	1	1524.6	0.0094
50	0.8	0.2	1	1	0.03	0.04	0.4	0	5	1	1046.4	0.0073
50	0.99	0.3	1	1	0.03	0.04	0.4	0.4	5	1	1493.5	0.0131
50	0.8	0.5	1	1	0.03	0.04	0.4	0.2	5	1	1694.5	0.01
50	0.8	0.01	1	1	0.03	0.04	0.4	0.3	5	1	1856.6	0.1457
50	0.8	0.4	1	1	0.03	0.04	0.4	0.2	5	1	1559.2	0.013
50	0.99	0.4	1	1	0.03	0.04	0.4	0.4	5	1	1463.7	0.0087
50	0.8	0.6	1	1	0.03	0.04	0.4	0	5	1	1823.9	0.0068
50	0.9	0.7	1	1	0.03	0.04	0.4	0	5	1	1888.3	0.0033
50	0.9	0.01	1	1	0.03	0.04	0.4	0	5	1	837.02	0.0061
50	0.8	0.5	1	1	0.03	0.04	0.4	0.3	5	1	1901.1	0.0162
50	0.8	0.6	1	1	0.03	0.04	0.4	0.2	5	1	1997.1	0.0108
50	0.8	0.6	1	1	0.03	0.04	0.4	0.1	5	1	1914.5	0.009
50	0.9	0.6	1	1	0.03	0.04	0.4	0.2	5	1	1815.3	0.0055
50	0.8	0.4	1	1	0.03	0.04	0.4	0.3	5	1	1723.3	0.0176
50	0.99	0.7	1	1	0.03	0.04	0.4	0.2	5	1	2001.4	0.0009
50	0.8	0.6	1	1	0.03	0.04	0.4	0.3	5	1	2076.5	0.0111
50	0.9	0.2	1	1	0.03	0.04	0.4	0.2	5	1	1377	0.0158
50	0.7	0.4	1	1	0.03	0.04	0.4	0	5	1	1410.8	0.0103
50	0.8	0.2	1	1	0.03	0.04	0.4	0.4	5	1	1861.4	0.0485
50	0.8	0.5	1	1	0.03	0.04	0.4	0.5	5	1	2162.8	0.0234
50	0.8	0.1	1	1	0.03	0.04	0.4	0	5	1	1020.5	0.0093
50	0.9	0.4	1	1	0.03	0.04	0.4	0.3	5	1	1680.7	0.0128
50	0.99	0.5	1	1	0.03	0.04	0.4	0.5	5	1	1942.8	0.0087
50	0.9	0.5	1	1	0.03	0.04	0.4	0.3	5	1	1800.2	0.0076
50	0.99	0.8	1	1	0.03	0.04	0.4	0.1	5	1	2623.7	0.0003
50	0.9	0.6	1	1	0.03	0.04	0.4	0.3	5	1	2028.4	0.0068
50	0.99	0.2	1	1	0.03	0.04	0.4	0.3	5	1	1424.1	0.0142
50	0.8	0.2	1	1	0.03	0.04	0.4	0.2	5	1	1472.5	0.0242
50	0.99	0.2	1	1	0.03	0.04	0.4	0.8	5	1	2416.5	0.1439
50	0.7	0.7	1	1	0.03	0.04	0.4	0.3	5	1	2556.6	0.0232
50	0.7	0.3	1	1	0.03	0.04	0.4	0	5	1	1197.3	0.0098
50	0.9	0.7	1	1	0.03	0.04	0.4	0.1	5	1	2371.7	0.0049
50	0.99	0.1	1	1	0.03	0.04	0.4	0.6	5	1	2069.5	0.1425
50	0.99	0.3	1	1	0.03	0.04	0.4	0.5	5	1	1977.8	0.0278
50	0.6	0.9	1	1	0.03	0.04	0.4	0.4	5	1	3108.1	0.0335
50	0.9	0.4	1	1	0.03	0.04	0.4	0.4	5	1	1845.8	0.0168
50	0.8	0.5	1	1	0.03	0.04	0.4	0.4	5	1	2052.4	0.0186
50	0.6	0.4	1	1	0.03	0.04	0.4	0	5	1	1457.2	0.0135
50	0.99	0.6	1	1	0.03	0.04	0.4	0.5	5	1	2136.1	0.0058
50	0.99	0.4	1	1	0.03	0.04	0.4	0.5	5	1	1938.8	0.0143
50	0.6	0.3	1	1	0.03	0.04	0.4	0	5	1	1264.2	0.013
50	0.9	0.6	1	1	0.03	0.04	0.4	0.4	5	1	2193.4	0.0093
50	0.8	0.4	1	1	0.03	0.04	0.4	0.4	5	1	1978.8	0.0232
50	0.9	0.3	1	1	0.03	0.04	0.4	0.3	5	1	1614.7	0.0159
50	0.9	0.5	1	1	0.03	0.04	0.4	0.5	5	1	2156.2	0.0182
50	0.8	0.5	1	1	0.03	0.04	0.4	0.9	5	1	2748	0.0553
50	0.7	0.3	1	1	0.03	0.04	0.4	0.1	5	1	1406.8	0.0142
50	0.8	0.4	1	1	0.03	0.04	0.4	0.9	5	1	2654.2	0.0821
50	0.7	0.4	1	1	0.03	0.04	0.4	0.4	5	1	1779.6	0.0266
50	0.6	0.9	1	1	0.03	0.04	0.4	0.1	5	1	3667.8	0.0596
50	0.99	0.8	1	1	0.03	0.04	0.4	0	5	1	2611.9	0.0004
50	0.8	0.7	1	1	0.03	0.04	0.4	0.3	5	1	2650.6	0.0152
50	0.99	0.01	1	1	0.03	0.04	0.4	0.1	5	1	1092.2	0.0117
50	0.99	0.5	1	1	0.03	0.04	0.4	0.6	5	1	2257.1	0.0146
50	0.7	0.5	1	1	0.03	0.04	0.4	0	5	1	1534.7	0.0091
50	0.9	0.2	1	1	0.03	0.04	0.4	0.3	5	1	1645.2	0.0271
50	0.99	0.7	1	1	0.03	0.04	0.4	0.4	5	1	2321.7	0.0028
50	0.9	0.1	1	1	0.03	0.04	0.4	0.2	5	1	1440.8	0.0269
50	0.6	0.99	1	1	0.03	0.04	0.4	0.8	5	1	2470	0.0169
50	0.8	0.2	1	1	0.03	0.04	0.4	0.3	5	1	1614.6	0.0329
50	0.7	0.1	1	1	0.03	0.04	0.4	0	5	1	1074.6	0.014
50	0.8	0.7	1	1	0.03	0.04	0.4	0	5	1	2605.7	0.0134
50	0.8	0.4	1	1	0.03	0.04	0.4	0.5	5	1	2053.1	0.0324
50	0.8	0.1	1	1	0.03	0.04	0.4	0.2	5	1	1556.7	0.0332
50	0.8	0.6	1	1	0.03	0.04	0.4	0.4	5	1	2324.1	0.0179
50	0.8	0.7	1	1	0.03	0.04	0.4	0.1	5	1	2658.3	0.0137
50	0.9	0.4	1	1	0.03	0.04	0.4	0.5	5	1	2087.5	0.0267
50	0.7	0.3	1	1	0.03	0.04	0.4	0.2	5	1	1543.8	0.0213
50	0.99	0.8	1	1	0.03	0.04	0.4	0.2	5	1	2999.1	0.0016
50	0.7	0.9	1	1	0.03	0.04	0.4	0.9	5	1	2878.1	0.0125
50	0.8	0.01	1	1	0.03	0.04	0.4	0	5	1	1100.7	0.0138
50	0.8	0.7	1	1	0.03	0.04	0.4	0.5	5	1	2708.1	0.0161
50	0.99	0.01	1	1	0.03	0.04	0.4	0.9	5	1	1483.2	0.5033
50	0.99	0.01	1	1	0.03	0.04	0.4	0.8	5	1	1566.2	0.4407
50	0.7	0.5	1	1	0.03	0.04	0.4	0.1	5	1	1683.8	0.0126
50	0.8	0.7	1	1	0.03	0.04	0.4	0.2	5	1	2789.3	0.0153
50	0.9	0.3	1	1	0.03	0.04	0.4	0.4	5	1	1859.6	0.0262
50	0.7	0.4	1	1	0.03	0.04	0.4	0.1	5	1	1465.1	0.0146
50	0.99	0.7	1	1	0.03	0.04	0.4	0.5	5	1	2657	0.0056
50	0.7	0.6	1	1	0.03	0.04	0.4	0.5	5	1	2168	0.0209
50	0.99	0.2	1	1	0.03	0.04	0.4	0.4	5	1	1753.4	0.0318
50	0.8	0.4	1	1	0.03	0.04	0.4	0.6	5	1	2284.7	0.0435
50	0.8	0.6	1	1	0.03	0.04	0.4	0.5	5	1	2522.1	0.0224
50	0.7	0.5	1	1	0.03	0.04	0.4	0.2	5	1	1864.2	0.0155
50	0.8	0.7	1	1	0.03	0.04	0.4	0.4	5	1	2843.8	0.0161
50	0.8	0.8	1	1	0.03	0.04	0.4	0	5	1	3395.9	0.0196
50	0.7	0.6	1	1	0.03	0.04	0.4	0	5	1	1864.1	0.0127
50	0.99	0.2	1	1	0.03	0.04	0.4	0.5	5	1	1948.5	0.0523
50	0.7	0.3	1	1	0.03	0.04	0.4	0.3	5	1	1696.1	0.0265
50	0.9	0.6	1	1	0.03	0.04	0.4	0.5	5	1	2570.7	0.0148
50	0.7	0.6	1	1	0.03	0.04	0.4	0.3	5	1	1974.7	0.0161
50	0.8	0.3	1	1	0.03	0.04	0.4	0.5	5	1	2037.5	0.0464
50	0.7	0.1	1	1	0.03	0.04	0.4	0.2	5	1	1587.2	0.0454
50	0.8	0.7	1	1	0.03	0.04	0.4	0.8	5	1	2846.6	0.0229
50	0.6	0.6	1	1	0.03	0.04	0.4	0.3	5	1	2009.7	0.0197
50	0.8	0.8	1	1	0.03	0.04	0.4	0.9	5	1	3261.1	0.018
50	0.6	0.7	1	1	0.03	0.04	0.4	0.7	5	1	1956.4	0.0144
50	0.6	0.9	1	1	0.03	0.04	0.4	0.9	5	1	1954.6	0.0064
50	0.7	0.4	1	1	0.03	0.04	0.4	0.3	5	1	1715.9	0.0229
50	0.7	0.6	1	1	0.03	0.04	0.4	0.4	5	1	2124	0.0198
50	0.99	0.6	1	1	0.03	0.04	0.4	0.6	5	1	2641.4	0.0113
50	0.8	0.3	1	1	0.03	0.04	0.4	0.4	5	1	2034.5	0.0401
50	0.9	0.1	1	1	0.03	0.04	0.4	0.6	5	1	2012.9	0.1424
50	0.9	0.1	1	1	0.03	0.04	0.4	0.3	5	1	1853.4	0.0526
50	0.6	0.4	1	1	0.03	0.04	0.4	0.3	5	1	1708.6	0.0231
50	0.99	0.4	1	1	0.03	0.04	0.4	0.6	5	1	2243.4	0.0263
50	0.8	0.5	1	1	0.03	0.04	0.4	0.6	5	1	2510.7	0.0352
50	0.99	0.8	1	1	0.03	0.04	0.4	0.3	5	1	3290.3	0.002
50	0.9	0.2	1	1	0.03	0.04	0.4	0.4	5	1	1785.7	0.0437
50	0.7	0.5	1	1	0.03	0.04	0.4	0.3	5	1	1885.5	0.0183
50	0.8	0.1	1	1	0.03	0.04	0.4	0.6	5	1	2049.8	0.1495
50	0.6	0.99	1	1	0.03	0.04	0.4	0.9	5	1	2241.2	0.009
50	0.6	0.2	1	1	0.03	0.04	0.4	0	5	1	1143.3	0.016
50	0.9	0.7	1	1	0.03	0.04	0.4	0.2	5	1	2628.4	0.0076
50	0.7	0.99	1	1	0.03	0.04	0.4	0.9	5	1	3513.6	0.0152
50	0.7	0.4	1	1	0.03	0.04	0.4	0.2	5	1	1715.2	0.018
50	0.99	0.5	1	1	0.03	0.04	0.4	0.7	5	1	2652.8	0.0254
50	0.6	0.7	1	1	0.03	0.04	0.4	0.8	5	1	2004.6	0.0157
50	0.8	0.2	1	1	0.03	0.04	0.4	0.7	5	1	2324.4	0.1235
50	0.7	0.9	1	1	0.03	0.04	0.4	0.8	5	1	3000.9	0.0164
50	0.9	0.5	1	1	0.03	0.04	0.4	0.6	5	1	2460.6	0.0262
50	0.8	0.6	1	1	0.03	0.04	0.4	0.6	5	1	2618	0.0264
50	0.9	0.1	1	1	0.03	0.04	0.4	0.7	5	1	2068.8	0.183
50	0.9	0.7	1	1	0.03	0.04	0.4	0.3	5	1	2631.6	0.0083
50	0.8	0.6	1	1	0.03	0.04	0.4	0.7	5	1	2649.8	0.0261
50	0.6	0.4	1	1	0.03	0.04	0.4	0.6	5	1	1954.5	0.0375
50	0.8	0.5	1	1	0.03	0.04	0.4	0.7	5	1	2699	0.0414
50	0.99	0.3	1	1	0.03	0.04	0.4	0.6	5	1	2215.6	0.0431
50	0.99	0.1	1	1	0.03	0.04	0.4	0.4	5	1	1878	0.0651
50	0.7	0.4	1	1	0.03	0.04	0.4	0.6	5	1	2222.6	0.043
50	0.7	0.6	1	1	0.03	0.04	0.4	0.2	5	1	2035.8	0.0169
50	0.8	0.3	1	1	0.03	0.04	0.4	0.6	5	1	2250.9	0.0651
50	0.8	0.01	1	1	0.03	0.04	0.4	0.1	5	1	1494.7	0.0456
50	0.99	0.6	1	1	0.03	0.04	0.4	0.7	5	1	2870.4	0.0161
50	0.8	0.1	1	1	0.03	0.04	0.4	0.3	5	1	1838.3	0.063
50	0.99	0.8	1	1	0.03	0.04	0.4	0.4	5	1	3406.2	0.0031
50	0.7	0.2	1	1	0.03	0.04	0.4	0.2	5	1	1538.6	0.0269
50	0.6	0.9	1	1	0.03	0.04	0.4	0.3	5	1	3131.5	0.0406
50	0.7	0.7	1	1	0.03	0.04	0.4	0.7	5	1	2296.4	0.0171
50	0.99	0.1	1	1	0.03	0.04	0.4	0.8	5	1	2144.5	0.2252
50	0.8	0.3	1	1	0.03	0.04	0.4	0.2	5	1	1501	0.0153
50	0.99	0.01	1	1	0.03	0.04	0.4	0.7	5	1	1692.4	0.3866
50	0.8	0.1	1	1	0.03	0.04	0.4	0.9	5	1	2036.8	0.247
50	0.9	0.4	1	1	0.03	0.04	0.4	0.7	5	1	2615.3	0.0532
50	0.6	0.3	1	1	0.03	0.04	0.4	0.5	5	1	1878.9	0.0469
50	0.5	0.9	1	1	0.03	0.04	0.4	0.8	5	1	1414.1	0.0058
50	0.9	0.7	1	1	0.03	0.04	0.4	0.4	5	1	2763.2	0.0102
50	0.7	0.5	1	1	0.03	0.04	0.4	0.7	5	1	2123.5	0.0316
50	0.7	0.4	1	1	0.03	0.04	0.4	0.9	5	1	2445	0.0695
50	0.99	0.2	1	1	0.03	0.04	0.4	0.9	5	1	2345.8	0.1716
50	0.9	0.3	1	1	0.03	0.04	0.4	0.5	5	1	2129.5	0.0439
50	0.8	0.4	1	1	0.03	0.04	0.4	0.7	5	1	2496.3	0.0553
50	0.7	0.01	1	1	0.03	0.04	0.4	0.2	5	1	1730.8	0.1006
50	0.6	0.8	1	1	0.03	0.04	0.4	0.8	5	1	1951.9	0.0099
50	0.8	0.3	1	1	0.03	0.04	0.4	0.7	5	1	2408.5	0.0813
50	0.7	0.7	1	1	0.03	0.04	0.4	0.8	5	1	2420.5	0.0206
50	0.99	0.7	1	1	0.03	0.04	0.4	0.9	5	1	4109.3	0.0228
50	0.9	0.1	1	1	0.03	0.04	0.4	0.1	5	1	1102.4	0.0109
50	0.8	0.3	1	1	0.03	0.04	0.4	0.3	5	1	1617.8	0.0207
50	0.7	0.4	1	1	0.03	0.04	0.4	0.7	5	1	2293.8	0.0526
50	0.99	0.1	1	1	0.03	0.04	0.4	0.2	5	1	1166.4	0.013
50	0.7	0.6	1	1	0.03	0.04	0.4	0.6	5	1	2300	0.0222
50	0.99	0.1	1	1	0.03	0.04	0.4	0.7	5	1	2136.8	0.1816
50	0.8	0.7	1	1	0.03	0.04	0.4	0.9	5	1	3389.8	0.0292
50	0.99	0.1	1	1	0.03	0.04	0.4	0.9	5	1	2121	0.2638
50	0.99	0.2	1	1	0.03	0.04	0.4	0.6	5	1	2196.7	0.0801
50	0.7	0.3	1	1	0.03	0.04	0.4	0.4	5	1	1899.7	0.0378
50	0.8	0.1	1	1	0.03	0.04	0.4	0.7	5	1	2076.8	0.1857
50	0.7	0.5	1	1	0.03	0.04	0.4	0.5	5	1	2147.5	0.0246
50	0.9	0.7	1	1	0.03	0.04	0.4	0.5	5	1	2827.1	0.0138
50	0.7	0.3	1	1	0.03	0.04	0.4	0.7	5	1	2192.1	0.073
50	0.8	0.9	1	1	0.03	0.04	0.4	0.9	5	1	3900.1	0.0149
50	0.99	0.9	1	1	0.03	0.04	0.4	0.4	5	1	8155.7	0.0077
50	0.5	0.99	1	1	0.03	0.04	0.4	0.9	5	1	1450.4	0.0049
50	0.7	0.2	1	1	0.03	0.04	0.4	0.3	5	1	1754.2	0.0406
50	0.8	0.7	1	1	0.03	0.04	0.4	0.6	5	1	3051.7	0.0216
50	0.7	0.99	1	1	0.03	0.04	0.4	0.8	5	1	3864.6	0.0226
50	0.99	0.2	1	1	0.03	0.04	0.4	0.7	5	1	2344.1	0.1071
50	0.9	0.6	1	1	0.03	0.04	0.4	0.6	5	1	2721.9	0.0205
50	0.7	0.9	1	1	0.03	0.04	0.4	0.7	5	1	3168.4	0.0203
50	0.8	0.1	1	1	0.03	0.04	0.4	0.8	5	1	2086.3	0.2194
50	0.8	0.9	1	1	0.03	0.04	0.4	0.8	5	1	4498.6	0.0212
50	0.8	0.1	1	1	0.03	0.04	0.4	0.4	5	1	1941.6	0.0898
50	0.9	0.01	1	1	0.03	0.04	0.4	0.9	5	1	1571.7	0.4901
50	0.8	0.8	1	1	0.03	0.04	0.4	0.3	5	1	3457.1	0.0182
50	0.9	0.6	1	1	0.03	0.04	0.4	0.7	5	1	2808.5	0.0223
50	0.99	0.3	1	1	0.03	0.04	0.4	0.9	5	1	2675.5	0.1199
50	0.9	0.5	1	1	0.03	0.04	0.4	0.7	5	1	2758.4	0.0358
50	0.7	0.7	1	1	0.03	0.04	0.4	0.6	5	1	2380.2	0.0192
50	0.7	0.5	1	1	0.03	0.04	0.4	0.4	5	1	1993	0.0214
50	0.99	0.3	1	1	0.03	0.04	0.4	0.8	5	1	2599.9	0.0891
50	0.9	0.4	1	1	0.03	0.04	0.4	0.6	5	1	2473.9	0.0379
50	0.7	0.6	1	1	0.03	0.04	0.4	0.7	5	1	2325.3	0.0239
50	0.99	0.9	1	1	0.03	0.04	0.4	0	5	1	6285	0.0019
50	0.5	0.9	1	1	0.03	0.04	0.4	0.9	5	1	1260	0.0041
50	0.8	0.7	1	1	0.03	0.04	0.4	0.7	5	1	3206.8	0.0242
50	0.9	0.8	1	1	0.03	0.04	0.4	0	5	1	3193.8	0.0069
50	0.8	0.3	1	1	0.03	0.04	0.4	0.9	5	1	2600.4	0.1196
50	0.99	0.01	1	1	0.03	0.04	0.4	0.6	5	1	1791	0.328
50	0.8	0.3	1	1	0.03	0.04	0.4	0.8	5	1	2503.8	0.1014
50	0.9	0.3	1	1	0.03	0.04	0.4	0.7	5	1	2368	0.0754
50	0.8	0.5	1	1	0.03	0.04	0.4	0.8	5	1	2769.8	0.0471
50	0.8	0.8	1	1	0.03	0.04	0.4	0.4	5	1	3605.7	0.0211
50	0.8	0.01	1	1	0.03	0.04	0.4	0.9	5	1	1624.2	0.4875
50	0.9	0.01	1	1	0.03	0.04	0.4	0.8	5	1	1673.1	0.4403
50	0.8	0.8	1	1	0.03	0.04	0.4	0.5	5	1	3414.1	0.0201
50	0.9	0.3	1	1	0.03	0.04	0.4	0.6	5	1	2236.6	0.0598
50	0.9	0.1	1	1	0.03	0.04	0.4	0.9	5	1	2115.7	0.2578
50	0.9	0.1	1	1	0.03	0.04	0.4	0.4	5	1	1980.4	0.0827
50	0.9	0.1	1	1	0.03	0.04	0.4	0.8	5	1	2079.9	0.2184
50	0.99	0.7	1	1	0.03	0.04	0.4	0.6	5	1	3338.8	0.0096
50	0.8	0.1	1	1	0.03	0.04	0.4	0.5	5	1	2095.4	0.1259
50	0.5	0.9	1	1	0.03	0.04	0.4	0.6	5	1	2125.4	0.0162
50	0.99	0.01	1	1	0.03	0.04	0.4	0.5	5	1	1854.4	0.2594
50	0.99	0.7	1	1	0.03	0.04	0.4	0.7	5	1	3393.7	0.0101
50	0.7	0.99	1	1	0.03	0.04	0.4	0.7	5	1	4047.3	0.0294
50	0.99	0.1	1	1	0.03	0.04	0.4	0.5	5	1	2150	0.1061
50	0.9	0.2	1	1	0.03	0.04	0.4	0.7	5	1	2278.1	0.1164
50	0.8	0.8	1	1	0.03	0.04	0.4	0.6	5	1	3507.4	0.02
50	0.7	0.8	1	1	0.03	0.04	0.4	0.8	5	1	2686	0.0147
50	0.9	0.7	1	1	0.03	0.04	0.4	0.6	5	1	2992.8	0.0146
50	0.6	0.7	1	1	0.03	0.04	0.4	0.9	5	1	1873.8	0.012
50	0.8	0.8	1	1	0.03	0.04	0.4	0.7	5	1	3472.7	0.0182
50	0.6	0.8	1	1	0.03	0.04	0.4	0.9	5	1	2019.2	0.0092
50	0.9	0.2	1	1	0.03	0.04	0.4	0.6	5	1	2338.9	0.0949
50	0.7	0.8	1	1	0.03	0.04	0.4	0.3	5	1	2935.3	0.0245
50	0.7	0.2	1	1	0.03	0.04	0.4	0	5	1	1169.6	0.0102
50	0.9	0.2	1	1	0.03	0.04	0.4	0.5	5	1	2185.4	0.0678
50	0.6	0.9	1	1	0.03	0.04	0.4	0.2	5	1	3624.3	0.052
50	0.9	0.1	1	1	0.03	0.04	0.4	0.5	5	1	2068.8	0.117
50	0.7	0.9	1	1	0.03	0.04	0.4	0.6	5	1	3411.9	0.0227
50	0.8	0.2	1	1	0.03	0.04	0.4	0.6	5	1	2174.6	0.0952
50	0.8	0.8	1	1	0.03	0.04	0.4	0.8	5	1	3614	0.0196
50	0.7	0.7	1	1	0.03	0.04	0.4	0	5	1	2376.2	0.0195
50	0.8	0.01	1	1	0.03	0.04	0.4	0.8	5	1	1688.2	0.4248
50	0.7	0.9	1	1	0.03	0.04	0.4	0.1	5	1	4219.2	0.047
50	0.7	0.5	1	1	0.03	0.04	0.4	0.6	5	1	2389.2	0.0318
50	0.99	0.4	1	1	0.03	0.04	0.4	0.7	5	1	2619	0.0421
50	0.8	0.8	1	1	0.03	0.04	0.4	0.2	5	1	3629.2	0.0204
50	0.6	0.3	1	1	0.03	0.04	0.4	0.1	5	1	1360.8	0.0188
50	0.7	0.8	1	1	0.03	0.04	0.4	0.7	5	1	2716	0.0178
50	0.8	0.2	1	1	0.03	0.04	0.4	0.5	5	1	2147.5	0.0772
50	0.7	0.4	1	1	0.03	0.04	0.4	0.5	5	1	1970.8	0.0325
50	0.99	0.3	1	1	0.03	0.04	0.4	0.7	5	1	2543.8	0.0713
50	0.9	0.5	1	1	0.03	0.04	0.4	0.4	5	1	1950.9	0.0126
50	0.7	0.7	1	1	0.03	0.04	0.4	0.9	5	1	2535.6	0.0212
50	0.5	0.7	1	1	0.03	0.04	0.4	0.6	5	1	1586.4	0.0114
50	0.7	0.6	1	1	0.03	0.04	0.4	0.8	5	1	2511.7	0.0307
50	0.9	0.2	1	1	0.03	0.04	0.4	0.9	5	1	2337.2	0.1667
50	0.9	0.01	1	1	0.03	0.04	0.4	0.1	5	1	1499.4	0.0321
50	0.7	0.7	1	1	0.03	0.04	0.4	0.4	5	1	2583.8	0.0195
50	0.7	0.7	1	1	0.03	0.04	0.4	0.5	5	1	2591.4	0.0221
50	0.6	0.7	1	1	0.03	0.04	0.4	0	5	1	2299.4	0.0268
50	0.6	0.8	1	1	0.03	0.04	0.4	0.7	5	1	2188.6	0.0145
50	0.6	0.9	1	1	0.03	0.04	0.4	0.8	5	1	2316.9	0.0123
50	0.7	0.2	1	1	0.03	0.04	0.4	0.7	5	1	2064.2	0.1087
50	0.6	0.7	1	1	0.03	0.04	0.4	0.6	5	1	1936.4	0.0174
50	0.9	0.6	1	1	0.03	0.04	0.4	0.8	5	1	3217.1	0.0351
50	0.7	0.2	1	1	0.03	0.04	0.4	0.4	5	1	1896.8	0.0572
50	0.7	0.2	1	1	0.03	0.04	0.4	0.1	5	1	1356	0.0187
50	0.6	0.4	1	1	0.03	0.04	0.4	0.2	5	1	1469.7	0.0172
50	0.7	0.6	1	1	0.03	0.04	0.4	0.9	5	1	2451.2	0.0303
50	0.8	0.8	1	1	0.03	0.04	0.4	0.1	5	1	3731.4	0.0207
50	0.99	0.5	1	1	0.03	0.04	0.4	0.9	5	1	3196.7	0.0546
50	0.99	0.01	1	1	0.03	0.04	0.4	0.2	5	1	1742.5	0.057
50	0.8	0.2	1	1	0.03	0.04	0.4	0.9	5	1	2277.5	0.1649
50	0.7	0.3	1	1	0.03	0.04	0.4	0.5	5	1	1960.6	0.0448
50	0.5	0.99	1	1	0.03	0.04	0.4	0.8	5	1	1720.4	0.0098
50	0.5	0.5	1	1	0.03	0.04	0.4	0.8	5	1	1560.4	0.0203
50	0.6	0.6	1	1	0.03	0.04	0.4	0	5	1	1965.5	0.02
50	0.9	0.2	1	1	0.03	0.04	0.4	0.8	5	1	2444.4	0.1474
50	0.4	0.99	1	1	0.03	0.04	0.4	0.9	5	1	912.13	0.0011
50	0.7	0.5	1	1	0.03	0.04	0.4	0.9	5	1	2410.7	0.0457
50	0.9	0.4	1	1	0.03	0.04	0.4	0.8	5	1	2927.8	0.0723
50	0.9	0.8	1	1	0.03	0.04	0.4	0.1	5	1	3575.2	0.0081
50	0.8	0.01	1	1	0.03	0.04	0.4	0.7	5	1	1772	0.3728
50	0.8	0.01	1	1	0.03	0.04	0.4	0.6	5	1	1807	0.3159
50	0.4	0.99	1	1	0.03	0.04	0.4	0.8	5	1	1099.1	0.005
50	0.6	0.5	1	1	0.03	0.04	0.4	0.4	5	1	1855.7	0.0236
50	0.9	0.8	1	1	0.03	0.04	0.4	0.2	5	1	3547.6	0.0088
50	0.6	0.5	1	1	0.03	0.04	0.4	0.1	5	1	1620.2	0.0162
50	0.6	0.3	1	1	0.03	0.04	0.4	0.2	5	1	1399.8	0.0215
50	0.6	0.6	1	1	0.03	0.04	0.4	0.7	5	1	1836.4	0.0191
50	0.6	0.5	1	1	0.03	0.04	0.4	0.9	5	1	2145	0.0333
50	0.4	0.9	1	1	0.03	0.04	0.4	0.6	5	1	1408.9	0.009
50	0.7	0.8	1	1	0.03	0.04	0.4	0.9	5	1	2684.5	0.0156
50	0.4	0.9	1	1	0.03	0.04	0.4	0.8	5	1	1008	0.002
50	0.6	0.8	1	1	0.03	0.04	0.4	0.6	5	1	2387.1	0.0186
50	0.6	0.8	1	1	0.03	0.04	0.4	0	5	1	2999.3	0.0399
50	0.6	0.99	1	1	0.03	0.04	0.4	0.7	5	1	3029.5	0.0262
50	0.9	0.01	1	1	0.03	0.04	0.4	0.4	5	1	1909.9	0.199
50	0.9	0.3	1	1	0.03	0.04	0.4	0.9	5	1	2658.8	0.1201
50	0.6	0.8	1	1	0.03	0.04	0.4	0.5	5	1	2366.1	0.0207
50	0.7	0.2	1	1	0.03	0.04	0.4	0.9	5	1	2219.6	0.1547
50	0.99	0.6	1	1	0.03	0.04	0.4	0.8	5	1	3604.3	0.0282
50	0.9	0.01	1	1	0.03	0.04	0.4	0.7	5	1	1735.1	0.3779
50	0.5	0.99	1	1	0.03	0.04	0.4	0.7	5	1	2028.5	0.0149
50	0.9	0.4	1	1	0.03	0.04	0.4	0.9	5	1	2871.3	0.0861
50	0.4	0.9	1	1	0.03	0.04	0.4	0.7	5	1	1141.7	0.0048
50	0.9	0.3	1	1	0.03	0.04	0.4	0.8	5	1	2675.5	0.1008
50	0.7	0.4	1	1	0.03	0.04	0.4	0.8	5	1	2248.6	0.0595
50	0.6	0.5	1	1	0.03	0.04	0.4	0.2	5	1	1796.6	0.0184
50	0.3	0.99	1	1	0.03	0.04	0.4	0.9	5	1	584.6	0.0004
50	0.5	0.8	1	1	0.03	0.04	0.4	0.9	5	1	1333.5	0.0053
50	0.99	0.01	1	1	0.03	0.04	0.4	0.4	5	1	1943.2	0.1951
50	0.6	0.9	1	1	0.03	0.04	0.4	0.6	5	1	2669.9	0.0212
50	0.99	0.7	1	1	0.03	0.04	0.4	0.8	5	1	3723.7	0.0173
50	0.4	0.9	1	1	0.03	0.04	0.4	0.9	5	1	785.93	0.0011
50	0.99	0.4	1	1	0.03	0.04	0.4	0.9	5	1	2846.2	0.0791
50	0.9	0.7	1	1	0.03	0.04	0.4	0.7	5	1	3332.4	0.0191
50	0.4	0.8	1	1	0.03	0.04	0.4	0.9	5	1	889.71	0.0012
50	0.99	0.8	1	1	0.03	0.04	0.4	0.5	5	1	4107.2	0.0059
50	0.99	0.01	1	1	0.03	0.04	0.4	0.3	5	1	1909.3	0.1246
50	0.6	0.6	1	1	0.03	0.04	0.4	0.1	5	1	2182.6	0.023
50	0.6	0.5	1	1	0.03	0.04	0.4	0.3	5	1	1779.4	0.0205
50	0.4	0.7	1	1	0.03	0.04	0.4	0.6	5	1	1314.9	0.0083
50	0.7	0.8	1	1	0.03	0.04	0.4	0.4	5	1	3034.1	0.0229
50	0.9	0.01	1	1	0.03	0.04	0.4	0.6	5	1	1820.9	0.3213
50	0.6	0.6	1	1	0.03	0.04	0.4	0.2	5	1	1912.9	0.0202
50	0.6	0.7	1	1	0.03	0.04	0.4	0.3	5	1	2214.4	0.0209
50	0.5	0.8	1	1	0.03	0.04	0.4	0.4	5	1	2037.4	0.0213
50	0.6	0.7	1	1	0.03	0.04	0.4	0.4	5	1	2145.9	0.0204
50	0.7	0.7	1	1	0.03	0.04	0.4	0.1	5	1	2613.1	0.0228
50	0.3	0.99	1	1	0.03	0.04	0.4	0.8	5	1	686.87	0.0012
50	0.7	0.1	1	1	0.03	0.04	0.4	0.8	5	1	2005.5	0.2083
50	0.7	0.2	1	1	0.03	0.04	0.4	0.5	5	1	2005.2	0.0732
50	0.99	0.4	1	1	0.03	0.04	0.4	0.8	5	1	2794.9	0.0595
50	0.5	0.6	1	1	0.03	0.04	0.4	0.1	5	1	1880.4	0.0214
50	0.5	0.9	1	1	0.03	0.04	0.4	0.7	5	1	1775.1	0.0125
50	0.6	0.6	1	1	0.03	0.04	0.4	0.6	5	1	1906.1	0.0178
50	0.7	0.8	1	1	0.03	0.04	0.4	0.5	5	1	3078.7	0.0245
50	0.7	0.9	1	1	0.03	0.04	0.4	0.5	5	1	3605.5	0.0292
50	0.4	0.8	1	1	0.03	0.04	0.4	0.6	5	1	1252.1	0.0074
50	0.8	0.01	1	1	0.03	0.04	0.4	0.5	5	1	1825.6	0.2531
50	0.7	0.8	1	1	0.03	0.04	0.4	0.6	5	1	2903.9	0.0198
50	0.9	0.5	1	1	0.03	0.04	0.4	0.8	5	1	3082	0.0504
50	0.7	0.9	1	1	0.03	0.04	0.4	0	5	1	4781.6	0.0614
50	0.6	0.7	1	1	0.03	0.04	0.4	0.2	5	1	2296	0.025
50	0.6	0.6	1	1	0.03	0.04	0.4	0.4	5	1	1992.7	0.0192
50	0.9	0.01	1	1	0.03	0.04	0.4	0.5	5	1	1906.1	0.2634
50	0.6	0.1	1	1	0.03	0.04	0.4	0	5	1	1111.9	0.0171
50	0.7	0.5	1	1	0.03	0.04	0.4	0.8	5	1	2552.7	0.0416
50	0.6	0.7	1	1	0.03	0.04	0.4	0.5	5	1	2177.3	0.0171
50	0.7	0.7	1	1	0.03	0.04	0.4	0.2	5	1	2713	0.0191
50	0.3	0.9	1	1	0.03	0.04	0.4	0.9	5	1	564.57	0.0002
50	0.9	0.5	1	1	0.03	0.04	0.4	0.9	5	1	3191.6	0.0616
50	0.4	0.99	1	1	0.03	0.04	0.4	0.7	5	1	1440.6	0.0088
50	0.7	0.3	1	1	0.03	0.04	0.4	0.8	5	1	2348.4	0.0949
50	0.5	0.6	1	1	0.03	0.04	0.4	0.2	5	1	1671.8	0.0188
50	0.6	0.9	1	1	0.03	0.04	0.4	0.7	5	1	2547.7	0.0173
50	0.6	0.7	1	1	0.03	0.04	0.4	0.1	5	1	2355.8	0.0244
50	0.4	0.8	1	1	0.03	0.04	0.4	0.8	5	1	1053.7	0.0031
50	0.99	0.6	1	1	0.03	0.04	0.4	0.9	5	1	3728.6	0.0363
50	0.2	0.99	1	1	0.03	0.04	0.4	0.9	5	1	338.1	0.0001
50	0.4	0.7	1	1	0.03	0.04	0.4	0.8	5	1	1012.2	0.004
50	0.9	0.01	1	1	0.03	0.04	0.4	0.3	5	1	1925.2	0.1389
50	0.5	0.8	1	1	0.03	0.04	0.4	0.8	5	1	1478.8	0.0063
50	0.6	0.2	1	1	0.03	0.04	0.4	0.8	5	1	2066.2	0.1217
50	0.9	0.7	1	1	0.03	0.04	0.4	0.8	5	1	3744.5	0.0228
50	0.2	0.99	1	1	0.03	0.04	0.4	0.7	5	1	509.39	0.0007
50	0.3	0.9	1	1	0.03	0.04	0.4	0.8	5	1	679.72	0.0007
50	0.6	0.99	1	1	0.03	0.04	0.4	0.6	5	1	3286.2	0.0347
50	0.3	0.8	1	1	0.03	0.04	0.4	0.9	5	1	566.23	0.0003
50	0.2	0.99	1	1	0.03	0.04	0.4	0.8	5	1	417.16	0
50	0.6	0.2	1	1	0.03	0.04	0.4	0.2	5	1	1425.6	0.0267
50	0.7	0.01	1	1	0.03	0.04	0.4	0	5	1	1189	0.0221
50	0.6	0.6	1	1	0.03	0.04	0.4	0.5	5	1	1991.2	0.0191
50	0.5	0.8	1	1	0.03	0.04	0.4	0.7	5	1	1554.7	0.0092
50	0.9	0.6	1	1	0.03	0.04	0.4	0.9	5	1	3649.9	0.0435
50	0.5	0.6	1	1	0.03	0.04	0.4	0.6	5	1	1516.6	0.0139
50	0.7	0.2	1	1	0.03	0.04	0.4	0.6	5	1	2045.4	0.0905
50	0.6	0.5	1	1	0.03	0.04	0.4	0.7	5	1	1906.9	0.0278
50	0.7	0.01	1	1	0.03	0.04	0.4	0.5	5	1	1864.7	0.2616
50	0.7	0.3	1	1	0.03	0.04	0.4	0.6	5	1	1958.2	0.056
50	0.6	0.8	1	1	0.03	0.04	0.4	0.4	5	1	2579.2	0.0236
50	0.5	0.7	1	1	0.03	0.04	0.4	0.9	5	1	1328.6	0.0064
50	0.7	0.8	1	1	0.03	0.04	0.4	0.2	5	1	3304.8	0.0282
50	0.8	0.2	1	1	0.03	0.04	0.4	0.8	5	1	2314.9	0.1459
50	0.8	0.01	1	1	0.03	0.04	0.4	0.4	5	1	1843.3	0.1983
50	0.4	0.7	1	1	0.03	0.04	0.4	0.2	5	1	1725.3	0.0231
50	0.6	0.5	1	1	0.03	0.04	0.4	0.5	5	1	1838.2	0.0237
50	0.9	0.8	1	1	0.03	0.04	0.4	0.3	5	1	3919.3	0.0129
50	0.9	0.01	1	1	0.03	0.04	0.4	0.2	5	1	1859.5	0.0826
50	0.7	0.9	1	1	0.03	0.04	0.4	0.4	5	1	3965.3	0.034
50	0.6	0.3	1	1	0.03	0.04	0.4	0.4	5	1	1742.7	0.0371
50	0.3	0.8	1	1	0.03	0.04	0.4	0.8	5	1	642.65	0.001
50	0.6	0.99	1	1	0.03	0.04	0.4	0.4	5	1	4113.5	0.0632
50	0.99	0.8	1	1	0.03	0.04	0.4	0.6	5	1	4667	0.0085
50	0.4	0.7	1	1	0.03	0.04	0.4	0.5	5	1	1406.8	0.0106
50	0.6	0.6	1	1	0.03	0.04	0.4	0.9	5	1	2009.3	0.0203
50	0.6	0.2	1	1	0.03	0.04	0.4	0.1	5	1	1310.7	0.0229
50	0.6	0.8	1	1	0.03	0.04	0.4	0.2	5	1	2801.8	0.0313
50	0.9	0.7	1	1	0.03	0.04	0.4	0.9	5	1	3938.7	0.0298
50	0.6	0.8	1	1	0.03	0.04	0.4	0.3	5	1	2737.4	0.0302
50	0.2	0.9	1	1	0.03	0.04	0.4	0.8	5	1	398.02	0.0001
50	0.4	0.6	1	1	0.03	0.04	0.4	0	5	1	1664.6	0.0257
50	0.6	0.4	1	1	0.03	0.04	0.4	0.1	5	1	1632.6	0.019
50	0.6	0.9	1	1	0.03	0.04	0.4	0.5	5	1	3075.9	0.0291
50	0.9	0.8	1	1	0.03	0.04	0.4	0.4	5	1	4116.3	0.0136
50	0.3	0.6	1	1	0.03	0.04	0.4	0.8	5	1	687.75	0.0021
50	0.3	0.99	1	1	0.03	0.04	0.4	0.7	5	1	886.99	0.0034
50	0.99	0.8	1	1	0.03	0.04	0.4	0.7	5	1	4978.6	0.0097
50	0.3	0.9	1	1	0.03	0.04	0.4	0.7	5	1	806.86	0.0013
50	0.7	0.99	1	1	0.03	0.04	0.4	0.6	5	1	4518.7	0.0414
50	0.2	0.9	1	1	0.03	0.04	0.4	0.9	5	1	343.34	0.0002
50	0.5	0.7	1	1	0.03	0.04	0.4	0.8	5	1	1458.5	0.0067
50	0.3	0.7	1	1	0.03	0.04	0.4	0.9	5	1	645.93	0.0003
50	0.2	0.8	1	1	0.03	0.04	0.4	0.9	5	1	383.21	0
50	0.5	0.5	1	1	0.03	0.04	0.4	0.4	5	1	1709.5	0.0218
50	0.6	0.1	1	1	0.03	0.04	0.4	0.1	5	1	1338.6	0.0309
50	0.6	0.8	1	1	0.03	0.04	0.4	0.1	5	1	3029	0.0351
50	0.4	0.8	1	1	0.03	0.04	0.4	0.7	5	1	1235.2	0.0059
50	0.2	0.9	1	1	0.03	0.04	0.4	0.7	5	1	523.99	0.0003
50	0.6	0.5	1	1	0.03	0.04	0.4	0.6	5	1	1943.4	0.0259
50	0.5	0.5	1	1	0.03	0.04	0.4	0.3	5	1	1710.5	0.0218
50	0.5	0.7	1	1	0.03	0.04	0.4	0.4	5	1	1857.9	0.0182
50	0.1	0.99	1	1	0.03	0.04	0.4	0.9	5	1	198.61	0
50	0.4	0.7	1	1	0.03	0.04	0.4	0.9	5	1	946.1	0.002
50	0.5	0.7	1	1	0.03	0.04	0.4	0.7	5	1	1571.1	0.0111
50	0.7	0.8	1	1	0.03	0.04	0.4	0.1	5	1	3428.5	0.0311
50	0.6	0.4	1	1	0.03	0.04	0.4	0.4	5	1	1926.9	0.0277
50	0.5	0.6	1	1	0.03	0.04	0.4	0.8	5	1	1462.1	0.0113
50	0.7	0.1	1	1	0.03	0.04	0.4	0.5	5	1	1839.8	0.1106
50	0.6	0.5	1	1	0.03	0.04	0.4	0.8	5	1	1955.8	0.0316
50	0.3	0.6	1	1	0.03	0.04	0.4	0.9	5	1	671.18	0.0007
50	0.6	0.4	1	1	0.03	0.04	0.4	0.5	5	1	1795	0.0308
50	0.2	0.8	1	1	0.03	0.04	0.4	0.8	5	1	446.01	0.0003
50	0.2	0.6	1	1	0.03	0.04	0.4	0.8	5	1	434.92	0
50	0.1	0.99	1	1	0.03	0.04	0.4	0.8	5	1	241.91	0
50	0.6	0.01	1	1	0.03	0.04	0.4	0	5	1	1291.5	0.0273
50	0.3	0.8	1	1	0.03	0.04	0.4	0.7	5	1	803.51	0.0012
50	0.6	0.2	1	1	0.03	0.04	0.4	0.3	5	1	1667.8	0.0443
50	0.4	0.9	1	1	0.03	0.04	0.4	0.3	5	1	2283.5	0.0362
50	0.1	0.99	1	1	0.03	0.04	0.4	0.7	5	1	277.75	0
50	0.2	0.9	1	1	0.03	0.04	0.4	0.6	5	1	638.62	0.0006
50	0.3	0.7	1	1	0.03	0.04	0.4	0.8	5	1	720.72	0.0009
50	0.6	0.3	1	1	0.03	0.04	0.4	0.3	5	1	1668.9	0.029
50	0.3	0.9	1	1	0.03	0.04	0.4	0.5	5	1	1293.1	0.0078
50	0.2	0.99	1	1	0.03	0.04	0.4	0.6	5	1	691.74	0.0018
50	0.3	0.5	1	1	0.03	0.04	0.4	0.9	5	1	745.09	0.0016
50	0.7	0.1	1	1	0.03	0.04	0.4	0.9	5	1	1979.9	0.237
50	0.4	0.6	1	1	0.03	0.04	0.4	0.9	5	1	977.4	0.0044
50	0.1	0.9	1	1	0.03	0.04	0.4	0.9	5	1	213	0
50	0.6	0.6	1	1	0.03	0.04	0.4	0.8	5	1	2157.4	0.0219
50	0.7	0.1	1	1	0.03	0.04	0.4	0.4	5	1	1778.5	0.0872
50	0.1	0.8	1	1	0.03	0.04	0.4	0.8	5	1	266.93	0
50	0.7	0.8	1	1	0.03	0.04	0.4	0	5	1	3441.4	0.0334
50	0.2	0.7	1	1	0.03	0.04	0.4	0.9	5	1	400.53	0
50	0.5	0.3	1	1	0.03	0.04	0.4	0.2	5	1	1459.9	0.025
50	0.7	0.1	1	1	0.03	0.04	0.4	0.3	5	1	1832.7	0.0713
50	0.5	0.6	1	1	0.03	0.04	0.4	0	5	1	1791.9	0.0236
50	0.6	0.99	1	1	0.03	0.04	0.4	0.5	5	1	3689.7	0.0471
50	0.7	0.9	1	1	0.03	0.04	0.4	0.2	5	1	4063.6	0.043
50	0.2	0.8	1	1	0.03	0.04	0.4	0.7	5	1	535.05	0.0002
50	0.1	0.9	1	1	0.03	0.04	0.4	0.8	5	1	249.01	0
50	0.5	0.3	1	1	0.03	0.04	0.4	0.3	5	1	1475.1	0.0301
50	0.3	0.7	1	1	0.03	0.04	0.4	0.7	5	1	771.78	0.002
50	0.5	0.8	1	1	0.03	0.04	0.4	0.6	5	1	1795.4	0.0133
50	0.1	0.8	1	1	0.03	0.04	0.4	0.9	5	1	237.46	0
50	0.7	0.99	1	1	0.03	0.04	0.4	0.5	5	1	4791.7	0.0505
50	0.7	0.01	1	1	0.03	0.04	0.4	0.9	5	1	1616	0.475
50	0.7	0.1	1	1	0.03	0.04	0.4	0.7	5	1	1979.6	0.1703
50	0.8	0.9	1	1	0.03	0.04	0.4	0.5	5	1	4368.2	0.0249
50	0.1	0.99	1	1	0.03	0.04	0.4	0.6	5	1	363.44	0
50	0.4	0.4	1	1	0.03	0.04	0.4	0.9	5	1	1327.9	0.0202
50	0.5	0.8	1	1	0.03	0.04	0.4	0.5	5	1	1951.4	0.0186
50	0.1	0.8	1	1	0.03	0.04	0.4	0.7	5	1	302.36	0
50	0.2	0.7	1	1	0.03	0.04	0.4	0.8	5	1	454.17	0.0002
50	0.4	0.7	1	1	0.03	0.04	0.4	0.7	5	1	1143.9	0.006
50	0.2	0.6	1	1	0.03	0.04	0.4	0.9	5	1	411.76	0.0001
50	0.7	0.3	1	1	0.03	0.04	0.4	0.9	5	1	2351.1	0.1068
50	0.1	0.8	1	1	0.03	0.04	0.4	0.5	5	1	451.31	0.0003
50	0.4	0.99	1	1	0.03	0.04	0.4	0.6	5	1	1735.4	0.0169
50	0.6	0.4	1	1	0.03	0.04	0.4	0.7	5	1	1884.1	0.039
50	0.3	0.99	1	1	0.03	0.04	0.4	0.6	5	1	1120	0.0072
50	0.1	0.7	1	1	0.03	0.04	0.4	0.8	5	1	270.39	0
50	0.1	0.9	1	1	0.03	0.04	0.4	0.7	5	1	322.83	0
50	0.7	0.9	1	1	0.03	0.04	0.4	0.3	5	1	4262	0.0421
50	0.7	0.2	1	1	0.03	0.04	0.4	0.8	5	1	2167.2	0.1336
50	0.7	0.1	1	1	0.03	0.04	0.4	0.6	5	1	1965.3	0.1459
50	0.3	0.8	1	1	0.03	0.04	0.4	0.6	5	1	973.53	0.0028
50	0.2	0.8	1	1	0.03	0.04	0.4	0.6	5	1	632.21	0.0007
50	0.4	0.6	1	1	0.03	0.04	0.4	0.5	5	1	1336.6	0.0105
50	0.4	0.99	1	1	0.03	0.04	0.4	0.5	5	1	2027.5	0.0269
50	0.1	0.9	1	1	0.03	0.04	0.4	0.6	5	1	386.29	0
50	0.3	0.7	1	1	0.03	0.04	0.4	0.6	5	1	926.45	0.0029
50	0.2	0.9	1	1	0.03	0.04	0.4	0.5	5	1	783.79	0.003
50	0.1	0.6	1	1	0.03	0.04	0.4	0.5	5	1	483.71	0.0002
50	0.1	0.99	1	1	0.03	0.04	0.4	0.5	5	1	486.06	0.0007
50	0.3	0.7	1	1	0.03	0.04	0.4	0.4	5	1	1155.3	0.009
50	0.2	0.7	1	1	0.03	0.04	0.4	0.7	5	1	541.82	0.0001
50	0.9	0.8	1	1	0.03	0.04	0.4	0.8	5	1	4748.5	0.0207
50	0.4	0.9	1	1	0.03	0.04	0.4	0.4	5	1	1924.8	0.0221
50	0.5	0.3	1	1	0.03	0.04	0.4	0.4	5	1	1557.7	0.0331
50	0.01	0.99	1	1	0.03	0.04	0.4	0.8	5	1	99.861	0
50	0.1	0.7	1	1	0.03	0.04	0.4	0.9	5	1	253.39	0
50	0.01	0.99	1	1	0.03	0.04	0.4	0.9	5	1	86.882	0
50	0.4	0.8	1	1	0.03	0.04	0.4	0.5	5	1	1409.7	0.0101
50	0.5	0.3	1	1	0.03	0.04	0.4	0.1	5	1	1342.3	0.0198
50	0.9	0.8	1	1	0.03	0.04	0.4	0.7	5	1	4222.2	0.0147
50	0.7	0.01	1	1	0.03	0.04	0.4	0.8	5	1	1686	0.4168
50	0.6	0.1	1	1	0.03	0.04	0.4	0.2	5	1	1471.6	0.0438
50	0.1	0.4	1	1	0.03	0.04	0.4	0.7	5	1	395.23	0.0001
50	0.4	0.6	1	1	0.03	0.04	0.4	0.8	5	1	1067.4	0.0042
50	0.4	0.5	1	1	0.03	0.04	0.4	0.3	5	1	1460.8	0.018
50	0.1	0.9	1	1	0.03	0.04	0.4	0.5	5	1	447.53	0.0003
50	0.5	0.6	1	1	0.03	0.04	0.4	0.9	5	1	1433.2	0.0104
50	0.2	0.3	1	1	0.03	0.04	0.4	0.7	5	1	762.98	0.0071
50	0.6	0.3	1	1	0.03	0.04	0.4	0.6	5	1	1945.8	0.053
50	0.9	0.8	1	1	0.03	0.04	0.4	0.5	5	1	4254.1	0.0134
50	0.5	0.7	1	1	0.03	0.04	0.4	0.3	5	1	1857.8	0.0211
50	0.01	0.99	1	1	0.03	0.04	0.4	0.7	5	1	114.67	0
50	0.3	0.2	1	1	0.03	0.04	0.4	0.4	5	1	1332.2	0.0339
50	0.5	0.5	1	1	0.03	0.04	0.4	0.7	5	1	1639	0.0204
50	0.01	0.9	1	1	0.03	0.04	0.4	0.5	5	1	196.09	0
50	0.01	0.99	1	1	0.03	0.04	0.4	0.6	5	1	139.7	0
50	0.1	0.6	1	1	0.03	0.04	0.4	0.7	5	1	312.45	0.0001
50	0.1	0.6	1	1	0.03	0.04	0.4	0.8	5	1	301.43	0
50	0.4	0.6	1	1	0.03	0.04	0.4	0.7	5	1	1102.6	0.0058
50	0.7	0.01	1	1	0.03	0.04	0.4	0.1	5	1	1589.8	0.0544
50	0.2	0.5	1	1	0.03	0.04	0.4	0.7	5	1	582.09	0.0011
50	0.5	0.7	1	1	0.03	0.04	0.4	0.1	5	1	2093	0.0267
50	0.2	0.6	1	1	0.03	0.04	0.4	0.7	5	1	548.47	0.0007
50	0.1	0.7	1	1	0.03	0.04	0.4	0.7	5	1	318.8	0
50	0.01	0.9	1	1	0.03	0.04	0.4	0.8	5	1	116.93	0
50	0.1	0.8	1	1	0.03	0.04	0.4	0.6	5	1	379.44	0
50	0.5	0.5	1	1	0.03	0.04	0.4	0.2	5	1	1635.3	0.0198
50	0.4	0.6	1	1	0.03	0.04	0.4	0.6	5	1	1252.6	0.0078
50	0.01	0.99	1	1	0.03	0.04	0.4	0.5	5	1	176.2	0
50	0.5	0.99	1	1	0.03	0.04	0.4	0.6	5	1	2486.9	0.0269
50	0.1	0.6	1	1	0.03	0.04	0.4	0.9	5	1	266.36	0
50	0.01	0.9	1	1	0.03	0.04	0.4	0.7	5	1	134.91	0
50	0.01	0.9	1	1	0.03	0.04	0.4	0.9	5	1	103.55	0
50	0.2	0.5	1	1	0.03	0.04	0.4	0.9	5	1	443.57	0.0004
50	0.01	0.99	1	1	0.03	0.04	0.4	0.4	5	1	254.91	0
50	0.8	0.9	1	1	0.03	0.04	0.4	0.6	5	1	4813.9	0.0244
50	0.4	0.5	1	1	0.03	0.04	0.4	0.8	5	1	1090.1	0.0096
50	0.2	0.7	1	1	0.03	0.04	0.4	0.6	5	1	637.66	0.0015
50	0.4	0.6	1	1	0.03	0.04	0.4	0.2	5	1	1579.3	0.0191
50	0.2	0.99	1	1	0.03	0.04	0.4	0.5	5	1	981.91	0.0062
50	0.8	0.01	1	1	0.03	0.04	0.4	0.2	5	1	1832.7	0.0968
50	0.3	0.4	1	1	0.03	0.04	0.4	0.6	5	1	993.83	0.0098
50	0.3	0.6	1	1	0.03	0.04	0.4	0.7	5	1	879.26	0.0033
50	0.01	0.9	1	1	0.03	0.04	0.4	0.4	5	1	248.33	0
50	0.2	0.8	1	1	0.03	0.04	0.4	0.5	5	1	758.36	0.0023
50	0.1	0.4	1	1	0.03	0.04	0.4	0.5	5	1	500.07	0.001
50	0.9	0.8	1	1	0.03	0.04	0.4	0.6	5	1	4424.8	0.0175
50	0.5	0.3	1	1	0.03	0.04	0.4	0.5	5	1	1757.9	0.0426
50	0.2	0.5	1	1	0.03	0.04	0.4	0.8	5	1	547.32	0.0004
50	0.1	0.7	1	1	0.03	0.04	0.4	0.6	5	1	381.16	0
50	0.8	0.9	1	1	0.03	0.04	0.4	0.7	5	1	4655	0.0243
50	0.01	0.9	1	1	0.03	0.04	0.4	0.6	5	1	160.61	0
50	0.3	0.5	1	1	0.03	0.04	0.4	0.5	5	1	1032.7	0.0068
50	0.5	0.7	1	1	0.03	0.04	0.4	0.5	5	1	1823.3	0.0169
50	0.1	0.5	1	1	0.03	0.04	0.4	0.9	5	1	287.35	0
50	0.3	0.4	1	1	0.03	0.04	0.4	0.7	5	1	957.27	0.0098
50	0.01	0.8	1	1	0.03	0.04	0.4	0.9	5	1	115.35	0
50	0.5	0.6	1	1	0.03	0.04	0.4	0.7	5	1	1554.3	0.0129
50	0.3	0.6	1	1	0.03	0.04	0.4	0.5	5	1	1120.1	0.0071
50	0.9	0.8	1	1	0.03	0.04	0.4	0.9	5	1	4466.9	0.021
50	0.2	0.9	1	1	0.03	0.04	0.4	0.4	5	1	990.04	0.0059
50	0.4	0.5	1	1	0.03	0.04	0.4	0.9	5	1	1120.7	0.0079
50	0.6	0.1	1	1	0.03	0.04	0.4	0.3	5	1	1629.2	0.0664
50	0.5	0.6	1	1	0.03	0.04	0.4	0.5	5	1	1732	0.0169
50	0.4	0.4	1	1	0.03	0.04	0.4	0	5	1	1337.3	0.0205
50	0.7	0.99	1	1	0.03	0.04	0.4	0.4	5	1	5240.8	0.0614
50	0.01	0.8	1	1	0.03	0.04	0.4	0.8	5	1	132.07	0
50	0.6	0.2	1	1	0.03	0.04	0.4	0.4	5	1	1791.2	0.0566
50	0.5	0.2	1	1	0.03	0.04	0.4	0	5	1	1267.8	0.0177
50	0.6	0.4	1	1	0.03	0.04	0.4	0.9	5	1	2040.3	0.0546
50	0.5	0.8	1	1	0.03	0.04	0.4	0.2	5	1	2334.5	0.0303
50	0.01	0.6	1	1	0.03	0.04	0.4	0.5	5	1	239.9	0
50	0.1	0.5	1	1	0.03	0.04	0.4	0.8	5	1	313.09	0
50	0.2	0.6	1	1	0.03	0.04	0.4	0.6	5	1	612.24	0.0009
50	0.3	0.6	1	1	0.03	0.04	0.4	0.6	5	1	966.42	0.0056
50	0.5	0.5	1	1	0.03	0.04	0.4	0.1	5	1	1614.8	0.0203
50	0.01	0.8	1	1	0.03	0.04	0.4	0.7	5	1	152.09	0
50	0.4	0.5	1	1	0.03	0.04	0.4	0.6	5	1	1209.2	0.0119
50	0.6	0.01	1	1	0.03	0.04	0.4	0.9	5	1	1610.1	0.4627
50	0.01	0.8	1	1	0.03	0.04	0.4	0.6	5	1	173.02	0
50	0.3	0.8	1	1	0.03	0.04	0.4	0.5	5	1	1010.9	0.0065
50	0.01	0.7	1	1	0.03	0.04	0.4	0.9	5	1	131.49	0
50	0.1	0.6	1	1	0.03	0.04	0.4	0.6	5	1	390.87	0.0002
50	0.2	0.3	1	1	0.03	0.04	0.4	0.6	5	1	876.65	0.0081
50	0.01	0.8	1	1	0.03	0.04	0.4	0.4	5	1	256.2	0
50	0.01	0.7	1	1	0.03	0.04	0.4	0.8	5	1	147.49	0
50	0.3	0.4	1	1	0.03	0.04	0.4	0.8	5	1	955.82	0.0063
50	0.01	0.7	1	1	0.03	0.04	0.4	0.7	5	1	161.03	0
50	0.01	0.8	1	1	0.03	0.04	0.4	0.5	5	1	214.39	0
50	0.01	0.6	1	1	0.03	0.04	0.4	0.8	5	1	158.41	0
50	0.3	0.4	1	1	0.03	0.04	0.4	0.5	5	1	1176.6	0.0131
50	0.4	0.99	1	1	0.03	0.04	0.4	0.3	5	1	2614.1	0.0568
50	0.99	0.9	1	1	0.03	0.04	0.4	0.6	5	1	9377.9	0.0103
50	0.3	0.9	1	1	0.03	0.04	0.4	0.6	5	1	1165.8	0.0041
50	0.5	0.4	1	1	0.03	0.04	0.4	0	5	1	1356.5	0.0154
50	0.5	0.9	1	1	0.03	0.04	0.4	0.5	5	1	2443.1	0.023
50	0.2	0.4	1	1	0.03	0.04	0.4	0.8	5	1	614.35	0.0016
50	0.5	0.5	1	1	0.03	0.04	0.4	0.5	5	1	1727.2	0.0221
50	0.6	0.4	1	1	0.03	0.04	0.4	0.8	5	1	2143.7	0.0486
50	0.2	0.99	1	1	0.03	0.04	0.4	0.4	5	1	1160.2	0.0116
50	0.6	0.1	1	1	0.03	0.04	0.4	0.9	5	1	1931.3	0.2218
50	0.01	0.7	1	1	0.03	0.04	0.4	0.6	5	1	185.8	0
50	0.2	0.4	1	1	0.03	0.04	0.4	0.4	5	1	898.71	0.007
50	0.01	0.6	1	1	0.03	0.04	0.4	0.9	5	1	142.19	0
50	0.4	0.9	1	1	0.03	0.04	0.4	0.5	5	1	1589.1	0.0122
50	0.5	0.4	1	1	0.03	0.04	0.4	0.5	5	1	1631.4	0.0257
50	0.01	0.6	1	1	0.03	0.04	0.4	0.6	5	1	202.01	0
50	0.3	0.99	1	1	0.03	0.04	0.4	0.5	5	1	1526.6	0.0153
50	0.3	0.5	1	1	0.03	0.04	0.4	0.6	5	1	978.95	0.0057
50	0.1	0.4	1	1	0.03	0.04	0.4	0.9	5	1	305.55	0
50	0.2	0.7	1	1	0.03	0.04	0.4	0.5	5	1	761.27	0.0024
50	0.01	0.5	1	1	0.03	0.04	0.4	0.6	5	1	216.86	0
50	0.2	0.4	1	1	0.03	0.04	0.4	0.5	5	1	852.92	0.0055
50	0.4	0.4	1	1	0.03	0.04	0.4	0.7	5	1	1345	0.0204
50	0.1	0.5	1	1	0.03	0.04	0.4	0.7	5	1	344.87	0.0002
50	0.01	0.99	1	1	0.03	0.04	0.4	0.3	5	1	407.09	0.0002
50	0.2	0.5	1	1	0.03	0.04	0.4	0	5	1	1274.5	0.0237
50	0.3	0.5	1	1	0.03	0.04	0.4	0.7	5	1	927.71	0.0039
50	0.5	0.3	1	1	0.03	0.04	0.4	0	5	1	1291.9	0.019
50	0.01	0.5	1	1	0.03	0.04	0.4	0.9	5	1	156.07	0
50	0.1	0.9	1	1	0.03	0.04	0.4	0.4	5	1	633.81	0.0017
50	0.01	0.9	1	1	0.03	0.04	0.4	0.3	5	1	362.91	0
50	0.6	0.01	1	1	0.03	0.04	0.4	0.6	5	1	1784.3	0.3063
50	0.1	0.7	1	1	0.03	0.04	0.4	0.5	5	1	478.41	0.0001
50	0.4	0.5	1	1	0.03	0.04	0.4	0.7	5	1	1215.9	0.0112
50	0.2	0.8	1	1	0.03	0.04	0.4	0.4	5	1	913.12	0.0053
50	0.01	0.7	1	1	0.03	0.04	0.4	0.2	5	1	495.09	0.0005
50	0.1	0.4	1	1	0.03	0.04	0.4	0.8	5	1	345.2	0.0001
50	0.4	0.99	1	1	0.03	0.04	0.4	0.4	5	1	2435.5	0.043
50	0.01	0.4	1	1	0.03	0.04	0.4	0.8	5	1	179.37	0
50	0.01	0.5	1	1	0.03	0.04	0.4	0.8	5	1	164.44	0
50	0.5	0.5	1	1	0.03	0.04	0.4	0	5	1	1526.8	0.0183
50	0.5	0.99	1	1	0.03	0.04	0.4	0.4	5	1	2982.2	0.0535
50	0.1	0.3	1	1	0.03	0.04	0.4	0.8	5	1	406.96	0.0001
50	0.7	0.99	1	1	0.03	0.04	0.4	0.3	5	1	5467.4	0.0733
50	0.01	0.7	1	1	0.03	0.04	0.4	0.5	5	1	223.23	0
50	0.5	0.99	1	1	0.03	0.04	0.4	0.5	5	1	2908.9	0.04
50	0.01	0.3	1	1	0.03	0.04	0.4	0.8	5	1	190.86	0
50	0.6	0.2	1	1	0.03	0.04	0.4	0.5	5	1	1777.2	0.0645
50	0.2	0.6	1	1	0.03	0.04	0.4	0.5	5	1	745.04	0.0021
50	0.1	0.8	1	1	0.03	0.04	0.4	0.4	5	1	593.6	0.0016
50	0.01	0.6	1	1	0.03	0.04	0.4	0.4	5	1	268.43	0
50	0.1	0.99	1	1	0.03	0.04	0.4	0.4	5	1	771.71	0.0035
50	0.4	0.7	1	1	0.03	0.04	0.4	0.4	5	1	1643.6	0.0148
50	0.01	0.8	1	1	0.03	0.04	0.4	0.3	5	1	338.97	0
50	0.5	0.4	1	1	0.03	0.04	0.4	0.7	5	1	1595.3	0.0309
50	0.3	0.7	1	1	0.03	0.04	0.4	0.5	5	1	1111.2	0.0061
50	0.3	0.5	1	1	0.03	0.04	0.4	0.8	5	1	876.52	0.0039
50	0.2	0.5	1	1	0.03	0.04	0.4	0.6	5	1	701.53	0.0023
50	0.01	0.6	1	1	0.03	0.04	0.4	0.7	5	1	172.41	0
50	0.01	0.4	1	1	0.03	0.04	0.4	0.9	5	1	162.83	0
50	0.5	0.9	1	1	0.03	0.04	0.4	0.4	5	1	2525	0.0304
50	0.01	0.5	1	1	0.03	0.04	0.4	0.7	5	1	184.47	0
50	0.5	0.6	1	1	0.03	0.04	0.4	0.3	5	1	1792.2	0.021
50	0.5	0.8	1	1	0.03	0.04	0.4	0.3	5	1	2188	0.0242
50	0.1	0.5	1	1	0.03	0.04	0.4	0.6	5	1	402.17	0.0002
50	0.4	0.5	1	1	0.03	0.04	0.4	0.5	5	1	1311.3	0.0141
50	0.6	0.2	1	1	0.03	0.04	0.4	0.6	5	1	1827.8	0.0797
50	0.6	0.1	1	1	0.03	0.04	0.4	0.4	5	1	1769.6	0.0915
50	0.6	0.99	1	1	0.03	0.04	0.4	0.3	5	1	4190.3	0.0743
50	0.01	0.5	1	1	0.03	0.04	0.4	0.5	5	1	240.74	0
50	0.01	0.7	1	1	0.03	0.04	0.4	0.4	5	1	276.33	0
50	0.01	0.3	1	1	0.03	0.04	0.4	0.6	5	1	235.04	0
50	0.1	0.3	1	1	0.03	0.04	0.4	0.9	5	1	351.55	0.0001
50	0.01	0.4	1	1	0.03	0.04	0.4	0.7	5	1	194.16	0
50	0.2	0.6	1	1	0.03	0.04	0.4	0.4	5	1	842.44	0.0051
50	0.2	0.4	1	1	0.03	0.04	0.4	0.6	5	1	745.19	0.0045
50	0.1	0.7	1	1	0.03	0.04	0.4	0.4	5	1	601.27	0.0011
50	0.1	0.6	1	1	0.03	0.04	0.4	0.4	5	1	577.47	0.0003
50	0.3	0.8	1	1	0.03	0.04	0.4	0.3	5	1	1641.3	0.0177
50	0.01	0.3	1	1	0.03	0.04	0.4	0.9	5	1	176.44	0
50	0.8	0.99	1	1	0.03	0.04	0.4	0.9	5	1	6032.7	0.023
50	0.2	0.4	1	1	0.03	0.04	0.4	0.7	5	1	708.9	0.002
50	0.2	0.5	1	1	0.03	0.04	0.4	0.5	5	1	836.41	0.004
50	0.5	0.4	1	1	0.03	0.04	0.4	0.2	5	1	1542	0.0229
50	0.99	0.8	1	1	0.03	0.04	0.4	0.8	5	1	5374.4	0.0139
50	0.2	0.4	1	1	0.03	0.04	0.4	0.9	5	1	549.95	0.0008
50	0.01	0.6	1	1	0.03	0.04	0.4	0.3	5	1	341.26	0.0001
50	0.01	0.4	1	1	0.03	0.04	0.4	0.3	5	1	351.13	0
50	0.5	0.4	1	1	0.03	0.04	0.4	0.1	5	1	1561.3	0.0214
50	0.01	0.3	1	1	0.03	0.04	0.4	0.7	5	1	214.92	0
50	0.1	0.3	1	1	0.03	0.04	0.4	0.7	5	1	421.67	0.0004
50	0.8	0.9	1	1	0.03	0.04	0.4	0.4	5	1	5099.3	0.0289
50	0.5	0.2	1	1	0.03	0.04	0.4	0.1	5	1	1299.8	0.0237
50	0.3	0.2	1	1	0.03	0.04	0.4	0.7	5	1	1436.3	0.0478
50	0.6	0.1	1	1	0.03	0.04	0.4	0.5	5	1	1782.5	0.1094
50	0.01	0.4	1	1	0.03	0.04	0.4	0.6	5	1	221.73	0
50	0.4	0.6	1	1	0.03	0.04	0.4	0.3	5	1	1583.9	0.0171
50	0.1	0.9	1	1	0.03	0.04	0.4	0.3	5	1	902.68	0.005
50	0.01	0.5	1	1	0.03	0.04	0.4	0.4	5	1	290.89	0
50	0.7	0.01	1	1	0.03	0.04	0.4	0.3	5	1	1865.1	0.1548
50	0.5	0.8	1	1	0.03	0.04	0.4	0	5	1	2628.6	0.0483
50	0.5	0.4	1	1	0.03	0.04	0.4	0.8	5	1	1711.4	0.0336
50	0.01	0.4	1	1	0.03	0.04	0.4	0.5	5	1	251.88	0
50	0.8	0.99	1	1	0.03	0.04	0.4	0.8	5	1	6078.5	0.027
50	0.01	0.2	1	1	0.03	0.04	0.4	0.7	5	1	236.81	0
50	0.6	0.5	1	1	0.03	0.04	0.4	0	5	1	1747.7	0.0203
50	0.4	0.3	1	1	0.03	0.04	0.4	0.3	5	1	1310.1	0.025
50	0.6	0.01	1	1	0.03	0.04	0.4	0.8	5	1	1637.3	0.4034
50	0.01	0.7	1	1	0.03	0.04	0.4	0.3	5	1	346.57	0
50	0.5	0.5	1	1	0.03	0.04	0.4	0.6	5	1	1666.9	0.0211
50	0.3	0.8	1	1	0.03	0.04	0.4	0.4	5	1	1328.4	0.0114
50	0.2	0.7	1	1	0.03	0.04	0.4	0.4	5	1	884.95	0.0046
50	0.01	0.2	1	1	0.03	0.04	0.4	0.9	5	1	191.27	0
50	0.01	0.4	1	1	0.03	0.04	0.4	0.4	5	1	290.97	0
50	0.5	0.99	1	1	0.03	0.04	0.4	0.1	5	1	3363.3	0.0969
50	0.99	0.9	1	1	0.03	0.04	0.4	0.3	5	1	7897.8	0.005
50	0.6	0.3	1	1	0.03	0.04	0.4	0.9	5	1	2129.4	0.0901
50	0.3	0.6	1	1	0.03	0.04	0.4	0.3	5	1	1203.9	0.0126
50	0.1	0.5	1	1	0.03	0.04	0.4	0.5	5	1	475.3	0.0005
50	0.4	0.8	1	1	0.03	0.04	0.4	0.4	5	1	1769.6	0.0163
50	0.4	0.99	1	1	0.03	0.04	0.4	0.2	5	1	2762.9	0.0789
50	0.5	0.1	1	1	0.03	0.04	0.4	0.1	5	1	1211.1	0.0308
50	0.1	0.4	1	1	0.03	0.04	0.4	0.4	5	1	551.88	0.0012
50	0.4	0.99	1	1	0.03	0.04	0.4	0.1	5	1	2754.8	0.0923
50	0.1	0.4	1	1	0.03	0.04	0.4	0.6	5	1	449.16	0.0005
50	0.01	0.2	1	1	0.03	0.04	0.4	0.8	5	1	208.25	0
50	0.6	0.3	1	1	0.03	0.04	0.4	0.8	5	1	2133	0.081
50	0.6	0.01	1	1	0.03	0.04	0.4	0.1	5	1	1556	0.0632
50	0.8	0.9	1	1	0.03	0.04	0.4	0.3	5	1	5007.7	0.0341
50	0.4	0.4	1	1	0.03	0.04	0.4	0.3	5	1	1335.8	0.019
50	0.1	0.4	1	1	0.03	0.04	0.4	0.2	5	1	769.91	0.0067
50	0.6	0.9	1	1	0.03	0.04	0.4	0	5	1	3956.9	0.0703
50	0.5	0.6	1	1	0.03	0.04	0.4	0.4	5	1	1763.5	0.0194
50	0.7	0.99	1	1	0.03	0.04	0.4	0	5	1	5889.2	0.1048
50	0.2	0.4	1	1	0.03	0.04	0.4	0	5	1	1165	0.019
50	0.6	0.2	1	1	0.03	0.04	0.4	0.7	5	1	2022.1	0.1039
50	0.3	0.9	1	1	0.03	0.04	0.4	0.4	5	1	1462.5	0.0146
50	0.7	0.99	1	1	0.03	0.04	0.4	0.2	5	1	5572	0.0843
50	0.5	0.2	1	1	0.03	0.04	0.4	0.5	5	1	1635.5	0.0583
50	0.01	0.1	1	1	0.03	0.04	0.4	0.9	5	1	233.58	0
50	0.7	0.99	1	1	0.03	0.04	0.4	0.1	5	1	5583	0.0903
50	0.01	0.3	1	1	0.03	0.04	0.4	0.5	5	1	275.28	0
50	0.5	0.4	1	1	0.03	0.04	0.4	0.9	5	1	1737.2	0.0354
50	0.1	0.3	1	1	0.03	0.04	0.4	0.6	5	1	483.66	0.0004
50	0.4	0.6	1	1	0.03	0.04	0.4	0.4	5	1	1520.4	0.0137
50	0.1	0.5	1	1	0.03	0.04	0.4	0.4	5	1	568.85	0.0018
50	0.5	0.5	1	1	0.03	0.04	0.4	0.9	5	1	1842.8	0.0228
50	0.01	0.5	1	1	0.03	0.04	0.4	0.3	5	1	350.36	0
50	0.1	0.7	1	1	0.03	0.04	0.4	0.3	5	1	725.84	0.0032
50	0.01	0.3	1	1	0.03	0.04	0.4	0.3	5	1	372.82	0.0002
50	0.5	0.99	1	1	0.03	0.04	0.4	0.3	5	1	3251	0.0671
50	0.4	0.2	1	1	0.03	0.04	0.4	0.2	5	1	1356.8	0.0296
50	0.2	0.7	1	1	0.03	0.04	0.4	0.3	5	1	1046.4	0.0067
50	0.2	0.9	1	1	0.03	0.04	0.4	0.3	5	1	1374.6	0.0154
50	0.9	0.9	1	1	0.03	0.04	0.4	0.7	5	1	6341.7	0.0185
50	0.1	0.8	1	1	0.03	0.04	0.4	0.3	5	1	752.3	0.0033
50	0.1	0.2	1	1	0.03	0.04	0.4	0.6	5	1	614.49	0.003
50	0.3	0.3	1	1	0.03	0.04	0.4	0.3	5	1	1235.1	0.0198
50	0.6	0.1	1	1	0.03	0.04	0.4	0.6	5	1	1870.2	0.1393
50	0.7	0.01	1	1	0.03	0.04	0.4	0.6	5	1	1816.9	0.3171
50	0.2	0.6	1	1	0.03	0.04	0.4	0.3	5	1	1040.4	0.0088
50	0.01	0.2	1	1	0.03	0.04	0.4	0.6	5	1	271.37	0
50	0.5	0.7	1	1	0.03	0.04	0.4	0.2	5	1	2204	0.0265
50	0.5	0.7	1	1	0.03	0.04	0.4	0	5	1	2350.6	0.0346
50	0.5	0.1	1	1	0.03	0.04	0.4	0	5	1	1176.3	0.0228
50	0.3	0.6	1	1	0.03	0.04	0.4	0.2	5	1	1327.8	0.0176
50	0.01	0.3	1	1	0.03	0.04	0.4	0.4	5	1	293.91	0
50	0.4	0.3	1	1	0.03	0.04	0.4	0	5	1	1179	0.0202
50	0.2	0.3	1	1	0.03	0.04	0.4	0.9	5	1	700.27	0.0034
50	0.01	0.9	1	1	0.03	0.04	0.4	0.2	5	1	588.73	0.0015
50	0.3	0.4	1	1	0.03	0.04	0.4	0.9	5	1	915.18	0.0071
50	0.1	0.6	1	1	0.03	0.04	0.4	0.2	5	1	806.87	0.0066
50	0.5	0.3	1	1	0.03	0.04	0.4	0.7	5	1	1766.1	0.0518
50	0.4	0.7	1	1	0.03	0.04	0.4	0.3	5	1	1691.2	0.0178
50	0.4	0.2	1	1	0.03	0.04	0.4	0	5	1	1114.8	0.0178
50	0.6	0.2	1	1	0.03	0.04	0.4	0.9	5	1	2096.9	0.1443
50	0.2	0.5	1	1	0.03	0.04	0.4	0.2	5	1	1085.1	0.0124
50	0.4	0.4	1	1	0.03	0.04	0.4	0.8	5	1	1339.3	0.0188
50	0.6	0.99	1	1	0.03	0.04	0.4	0.2	5	1	4385.8	0.0914
50	0.01	0.2	1	1	0.03	0.04	0.4	0.5	5	1	290.07	0
50	0.6	0.99	1	1	0.03	0.04	0.4	0	5	1	4540	0.1159
50	0.3	0.99	1	1	0.03	0.04	0.4	0.4	5	1	1672.3	0.0236
50	0.3	0.7	1	1	0.03	0.04	0.4	0.3	5	1	1323.5	0.0142
50	0.1	0.5	1	1	0.03	0.04	0.4	0.3	5	1	678.14	0.0023
50	0.5	0.99	1	1	0.03	0.04	0.4	0.2	5	1	3415.9	0.084
50	0.2	0.3	1	1	0.03	0.04	0.4	0.8	5	1	744.74	0.0035
50	0.4	0.8	1	1	0.03	0.04	0.4	0.3	5	1	1957.1	0.0222
50	0.2	0.6	1	1	0.03	0.04	0.4	0.2	5	1	1134.3	0.0138
50	0.9	0.9	1	1	0.03	0.04	0.4	0.8	5	1	6393.2	0.0198
50	0.4	0.4	1	1	0.03	0.04	0.4	0.5	5	1	1390.7	0.0178
50	0.01	0.1	1	1	0.03	0.04	0.4	0.6	5	1	339.23	0
50	0.6	0.99	1	1	0.03	0.04	0.4	0.1	5	1	4391.4	0.0987
50	0.2	0.99	1	1	0.03	0.04	0.4	0.3	5	1	1525.9	0.0276
50	0.2	0.3	1	1	0.03	0.04	0.4	0.4	5	1	961.07	0.0126
50	0.3	0.5	1	1	0.03	0.04	0.4	0.4	5	1	1120.2	0.011
50	0.4	0.4	1	1	0.03	0.04	0.4	0.1	5	1	1413.7	0.022
50	0.2	0.8	1	1	0.03	0.04	0.4	0.3	5	1	1190.1	0.01
50	0.1	0.2	1	1	0.03	0.04	0.4	0.9	5	1	486.27	0.0002
50	0.01	0.5	1	1	0.03	0.04	0.4	0.2	5	1	447.61	0.0003
50	0.99	0.9	1	1	0.03	0.04	0.4	0.1	5	1	6166.1	0.0026
50	0.01	0.1	1	1	0.03	0.04	0.4	0.8	5	1	257.51	0
50	0.99	0.8	1	1	0.03	0.04	0.4	0.9	5	1	6155.3	0.0177
50	0.5	0.2	1	1	0.03	0.04	0.4	0.3	5	1	1558.6	0.0374
50	0.1	0.3	1	1	0.03	0.04	0.4	0.2	5	1	786.73	0.0082
50	0.4	0.3	1	1	0.03	0.04	0.4	0.7	5	1	1509.6	0.0358
50	0.2	0.6	1	1	0.03	0.04	0.4	0.1	5	1	1283.6	0.0187
50	0.4	0.2	1	1	0.03	0.04	0.4	0.1	5	1	1311	0.0254
50	0.01	0.8	1	1	0.03	0.04	0.4	0.2	5	1	543.44	0.0012
50	0.2	0.5	1	1	0.03	0.04	0.4	0.3	5	1	911.79	0.0085
50	0.3	0.6	1	1	0.03	0.04	0.4	0.4	5	1	1211.8	0.0102
50	0.3	0.4	1	1	0.03	0.04	0.4	0.3	5	1	1201.1	0.0144
50	0.4	0.4	1	1	0.03	0.04	0.4	0.6	5	1	1413.9	0.021
50	0.3	0.5	1	1	0.03	0.04	0.4	0.2	5	1	1353.9	0.0176
50	0.8	0.9	1	1	0.03	0.04	0.4	0.2	5	1	5344.9	0.0376
50	0.4	0.5	1	1	0.03	0.04	0.4	0.1	5	1	1545.8	0.019
50	0.4	0.9	1	1	0.03	0.04	0.4	0.2	5	1	2379.7	0.0443
50	0.4	0.6	1	1	0.03	0.04	0.4	0.1	5	1	1697.3	0.0246
50	0.4	0.3	1	1	0.03	0.04	0.4	0.5	5	1	1295.4	0.0266
50	0.1	0.2	1	1	0.03	0.04	0.4	0.5	5	1	716.87	0.0057
50	0.1	0.2	1	1	0.03	0.04	0.4	0.8	5	1	527.89	0.0019
50	0.4	0.3	1	1	0.03	0.04	0.4	0.2	5	1	1367.7	0.0237
50	0.01	0.6	1	1	0.03	0.04	0.4	0.2	5	1	498.71	0.0005
50	0.01	0.4	1	1	0.03	0.04	0.4	0.2	5	1	449.88	0.0011
50	0.3	0.4	1	1	0.03	0.04	0.4	0.4	5	1	1143.7	0.0135
50	0.1	0.6	1	1	0.03	0.04	0.4	0.3	5	1	697.62	0.0034
50	0.01	0.1	1	1	0.03	0.04	0.4	0.7	5	1	297.28	0
50	0.01	0.2	1	1	0.03	0.04	0.4	0.4	5	1	348.72	0
50	0.7	0.01	1	1	0.03	0.04	0.4	0.4	5	1	1849.9	0.2045
50	0.2	0.3	1	1	0.03	0.04	0.4	0	5	1	1014.6	0.0184
50	0.4	0.3	1	1	0.03	0.04	0.4	0.1	5	1	1384.2	0.0238
50	0.4	0.3	1	1	0.03	0.04	0.4	0.4	5	1	1329.8	0.027
50	0.99	0.9	1	1	0.03	0.04	0.4	0.2	5	1	7083.1	0.0042
50	0.3	0.3	1	1	0.03	0.04	0.4	0.7	5	1	1131.4	0.0196
50	0.4	0.5	1	1	0.03	0.04	0.4	0.2	5	1	1454.4	0.0213
50	0.1	0.99	1	1	0.03	0.04	0.4	0.3	5	1	1073.7	0.0131
50	0.3	0.5	1	1	0.03	0.04	0.4	0	5	1	1422.5	0.0232
50	0.2	0.5	1	1	0.03	0.04	0.4	0.4	5	1	897.51	0.0057
50	0.6	0.1	1	1	0.03	0.04	0.4	0.7	5	1	1983.4	0.1704
50	0.5	0.3	1	1	0.03	0.04	0.4	0.6	5	1	1781.1	0.0439
50	0.4	0.8	1	1	0.03	0.04	0.4	0.1	5	1	2153.1	0.0371
50	0.3	0.7	1	1	0.03	0.04	0.4	0.2	5	1	1555.2	0.021
50	0.1	0.3	1	1	0.03	0.04	0.4	0.5	5	1	595.17	0.0013
50	0.5	0.9	1	1	0.03	0.04	0.4	0.2	5	1	3077.3	0.0514
50	0.4	0.4	1	1	0.03	0.04	0.4	0.2	5	1	1452	0.0206
50	0.3	0.1	1	1	0.03	0.04	0.4	0	5	1	1039	0.0225
50	0.3	0.6	1	1	0.03	0.04	0.4	0	5	1	1574.9	0.027
50	0.4	0.8	1	1	0.03	0.04	0.4	0.2	5	1	2170.4	0.0324
50	0.01	0.2	1	1	0.03	0.04	0.4	0.3	5	1	406.26	0.0002
50	0.5	0.9	1	1	0.03	0.04	0.4	0	5	1	3100.5	0.0709
50	0.3	0.99	1	1	0.03	0.04	0.4	0.3	5	1	2116.8	0.0464
50	0.2	0.2	1	1	0.03	0.04	0.4	0.8	5	1	1054.3	0.0204
50	0.2	0.3	1	1	0.03	0.04	0.4	0.5	5	1	871	0.0093
50	0.5	0.9	1	1	0.03	0.04	0.4	0.1	5	1	3136.5	0.0608
50	0.3	0.5	1	1	0.03	0.04	0.4	0.1	5	1	1321.1	0.0193
50	0.1	0.3	1	1	0.03	0.04	0.4	0	5	1	1024.9	0.0179
50	0.01	0.9	1	1	0.03	0.04	0.4	0.1	5	1	1076.1	0.0141
50	0.5	0.1	1	1	0.03	0.04	0.4	0.8	5	1	1851.2	0.1786
50	0.1	0.2	1	1	0.03	0.04	0.4	0.2	5	1	900.24	0.0109
50	0.01	0.2	1	1	0.03	0.04	0.4	0.1	5	1	605.29	0.0029
50	0.1	0.2	1	1	0.03	0.04	0.4	0.7	5	1	565.26	0.0017
50	0.5	0.99	1	1	0.03	0.04	0.4	0	5	1	3653	0.1159
50	0.4	0.5	1	1	0.03	0.04	0.4	0	5	1	1598.4	0.0232
50	0.1	0.5	1	1	0.03	0.04	0.4	0.2	5	1	822.86	0.0054
50	0.5	0.1	1	1	0.03	0.04	0.4	0.2	5	1	1494.1	0.0474
50	0.3	0.5	1	1	0.03	0.04	0.4	0.3	5	1	1223.6	0.0157
50	0.01	0.5	1	1	0.03	0.04	0.4	0.1	5	1	627.45	0.0029
50	0.3	0.3	1	1	0.03	0.04	0.4	0.6	5	1	1150.5	0.0184
50	0.3	0.3	1	1	0.03	0.04	0.4	0.8	5	1	1255	0.0222
50	0.2	0.4	1	1	0.03	0.04	0.4	0.3	5	1	1054.7	0.01
50	0.4	0.2	1	1	0.03	0.04	0.4	0.4	5	1	1465.2	0.0439
50	0.1	0.4	1	1	0.03	0.04	0.4	0.3	5	1	683	0.0038
50	0.4	0.7	1	1	0.03	0.04	0.4	0	5	1	2013.7	0.0333
50	0.5	0.2	1	1	0.03	0.04	0.4	0.2	5	1	1441	0.0302
50	0.4	0.1	1	1	0.03	0.04	0.4	0	5	1	1135.3	0.0207
50	0.01	0.1	1	1	0.03	0.04	0.4	0.5	5	1	382.19	0.0001
50	0.9	0.9	1	1	0.03	0.04	0.4	0.6	5	1	6142.8	0.0205
50	0.1	0.7	1	1	0.03	0.04	0.4	0.2	5	1	1004.1	0.0088
50	0.4	0.2	1	1	0.03	0.04	0.4	0.9	5	1	1698.5	0.0902
50	0.3	0.9	1	1	0.03	0.04	0.4	0.3	5	1	1806.1	0.0271
50	0.3	0.3	1	1	0.03	0.04	0.4	0.1	5	1	1182.4	0.0203
50	0.4	0.2	1	1	0.03	0.04	0.4	0.6	5	1	1605.4	0.0633
50	0.2	0.99	1	1	0.03	0.04	0.4	0.2	5	1	1903.6	0.0517
50	0.8	0.99	1	1	0.03	0.04	0.4	0.6	5	1	6615.6	0.0415
50	0.1	0.3	1	1	0.03	0.04	0.4	0.4	5	1	634.68	0.0027
50	0.01	0.8	1	1	0.03	0.04	0.4	0.1	5	1	842.14	0.007
50	0.01	0.99	1	1	0.03	0.04	0.4	0.2	5	1	791.04	0.0045
50	0.3	0.1	1	1	0.03	0.04	0.4	0.2	5	1	1269.2	0.0394
50	0.2	0.3	1	1	0.03	0.04	0.4	0.1	5	1	1019.1	0.0141
50	0.3	0.2	1	1	0.03	0.04	0.4	0	5	1	1110	0.0209
50	0.3	0.3	1	1	0.03	0.04	0.4	0.9	5	1	1196.7	0.0202
50	0.2	0.9	1	1	0.03	0.04	0.4	0.1	5	1	1969.2	0.0484
50	0.3	0.01	1	1	0.03	0.04	0.4	0.4	5	1	1624.7	0.1797
50	0.1	0.8	1	1	0.03	0.04	0.4	0.2	5	1	1035.1	0.0093
50	0.5	0.3	1	1	0.03	0.04	0.4	0.9	5	1	1908	0.0663
50	0.8	0.99	1	1	0.03	0.04	0.4	0.7	5	1	6662.9	0.0353
50	0.5	0.2	1	1	0.03	0.04	0.4	0.8	5	1	1922.8	0.1052
50	0.6	0.01	1	1	0.03	0.04	0.4	0.2	5	1	1660.9	0.1026
50	0.2	0.7	1	1	0.03	0.04	0.4	0.2	5	1	1256.5	0.0155
50	0.2	0.8	1	1	0.03	0.04	0.4	0	5	1	1736.5	0.0416
50	0.01	0.6	1	1	0.03	0.04	0.4	0	5	1	1047.2	0.012
50	0.4	0.3	1	1	0.03	0.04	0.4	0.8	5	1	1604.7	0.041
50	0.3	0.2	1	1	0.03	0.04	0.4	0.2	5	1	1149.3	0.0231
50	0.1	0.7	1	1	0.03	0.04	0.4	0.1	5	1	1188.8	0.0155
50	0.5	0.01	1	1	0.03	0.04	0.4	0.7	5	1	1668.2	0.3451
50	0.2	0.8	1	1	0.03	0.04	0.4	0.2	5	1	1445.5	0.018
50	0.1	0.2	1	1	0.03	0.04	0.4	0	5	1	997.95	0.0168
50	0.5	0.1	1	1	0.03	0.04	0.4	0.7	5	1	1803.1	0.1503
50	0.2	0.4	1	1	0.03	0.04	0.4	0.1	5	1	1182.5	0.0167
50	0.4	0.2	1	1	0.03	0.04	0.4	0.3	5	1	1450.4	0.0384
50	0.1	0.9	1	1	0.03	0.04	0.4	0.2	5	1	1165.7	0.0151
50	0.3	0.2	1	1	0.03	0.04	0.4	0.5	5	1	1230.2	0.0358
50	0.2	0.3	1	1	0.03	0.04	0.4	0.3	5	1	1004.5	0.0128
50	0.4	0.8	1	1	0.03	0.04	0.4	0	5	1	2202.9	0.0471
50	0.6	0.1	1	1	0.03	0.04	0.4	0.8	5	1	1980.2	0.2012
50	0.1	0.3	1	1	0.03	0.04	0.4	0.3	5	1	685.77	0.0042
50	0.1	0.7	1	1	0.03	0.04	0.4	0	5	1	1346.3	0.029
50	0.01	0.1	1	1	0.03	0.04	0.4	0.4	5	1	419.71	0
50	0.3	0.2	1	1	0.03	0.04	0.4	0.1	5	1	1185.6	0.0257
50	0.3	0.6	1	1	0.03	0.04	0.4	0.1	5	1	1589.5	0.0222
50	0.3	0.7	1	1	0.03	0.04	0.4	0.1	5	1	1626.1	0.0262
50	0.2	0.2	1	1	0.03	0.04	0.4	0.5	5	1	1035.6	0.0184
50	0.5	0.8	1	1	0.03	0.04	0.4	0.1	5	1	2663.1	0.0397
50	0.3	0.3	1	1	0.03	0.04	0.4	0	5	1	1249.8	0.0218
50	0.3	0.4	1	1	0.03	0.04	0.4	0.1	5	1	1179.6	0.0177
50	0.4	0.1	1	1	0.03	0.04	0.4	0.4	5	1	1605.5	0.0808
50	0.01	0.3	1	1	0.03	0.04	0.4	0.2	5	1	444.88	0.0012
50	0.01	0.99	1	1	0.03	0.04	0.4	0.1	5	1	1538.2	0.0394
50	0.3	0.4	1	1	0.03	0.04	0.4	0.2	5	1	1283.7	0.0186
50	0.1	0.4	1	1	0.03	0.04	0.4	0	5	1	1160.2	0.0203
50	0.01	0.1	1	1	0.03	0.04	0.4	0.3	5	1	504.24	0.0011
50	0.4	0.99	1	1	0.03	0.04	0.4	0	5	1	2994.5	0.1117
50	0.01	0.7	1	1	0.03	0.04	0.4	0.1	5	1	737.63	0.0038
50	0.1	0.2	1	1	0.03	0.04	0.4	0.4	5	1	719.28	0.0065
50	0.4	0.1	1	1	0.03	0.04	0.4	0.6	5	1	1665.9	0.1105
50	0.4	0.1	1	1	0.03	0.04	0.4	0.1	5	1	1290.6	0.0356
50	0.3	0.99	1	1	0.03	0.04	0.4	0	5	1	2433.9	0.1036
50	0.01	0.2	1	1	0.03	0.04	0.4	0.2	5	1	505.43	0.0012
50	0.4	0.7	1	1	0.03	0.04	0.4	0.1	5	1	1937.5	0.0272
50	0.3	0.1	1	1	0.03	0.04	0.4	0.1	5	1	1203.6	0.0324
50	0.2	0.3	1	1	0.03	0.04	0.4	0.2	5	1	1039.1	0.0161
50	0.2	0.2	1	1	0.03	0.04	0.4	0.2	5	1	1123.2	0.0219
50	0.01	0.6	1	1	0.03	0.04	0.4	0.1	5	1	676.28	0.0047
50	0.3	0.01	1	1	0.03	0.04	0.4	0	5	1	1078.5	0.0343
50	0.3	0.3	1	1	0.03	0.04	0.4	0.4	5	1	1115.7	0.0193
50	0.5	0.4	1	1	0.03	0.04	0.4	0.6	5	1	1583.1	0.0296
50	0.2	0.2	1	1	0.03	0.04	0.4	0.3	5	1	1040	0.0202
50	0.8	0.9	1	1	0.03	0.04	0.4	0	5	1	5678.5	0.0457
50	0.2	0.7	1	1	0.03	0.04	0.4	0.1	5	1	1364	0.0208
50	0.5	0.1	1	1	0.03	0.04	0.4	0.3	5	1	1592.7	0.0649
50	0.1	0.5	1	1	0.03	0.04	0.4	0.1	5	1	991.5	0.0096
50	0.3	0.4	1	1	0.03	0.04	0.4	0	5	1	1376.8	0.0241
50	0.5	0.2	1	1	0.03	0.04	0.4	0.6	5	1	1821.2	0.0765
50	0.2	0.5	1	1	0.03	0.04	0.4	0.1	5	1	1245	0.0161
50	0.3	0.3	1	1	0.03	0.04	0.4	0.5	5	1	1261.3	0.0197
50	0.5	0.1	1	1	0.03	0.04	0.4	0.6	5	1	1723.6	0.1196
50	0.3	0.2	1	1	0.03	0.04	0.4	0.3	5	1	1181.4	0.0271
50	0.3	0.9	1	1	0.03	0.04	0.4	0.1	5	1	2359.2	0.0574
50	0.2	0.2	1	1	0.03	0.04	0.4	0	5	1	1155.5	0.0222
50	0.3	0.99	1	1	0.03	0.04	0.4	0.1	5	1	2424.5	0.086
50	0.4	0.3	1	1	0.03	0.04	0.4	0.9	5	1	1659.9	0.0447
50	0.5	0.2	1	1	0.03	0.04	0.4	0.7	5	1	1799.3	0.0904
50	0.3	0.9	1	1	0.03	0.04	0.4	0.2	5	1	2031.5	0.0376
50	0.3	0.2	1	1	0.03	0.04	0.4	0.9	5	1	1467.7	0.0551
50	0.01	0.4	1	1	0.03	0.04	0.4	0.1	5	1	667.16	0.0037
50	0.4	0.1	1	1	0.03	0.04	0.4	0.2	5	1	1433	0.0474
50	0.1	0.99	1	1	0.03	0.04	0.4	0.2	5	1	1419.6	0.0297
50	0.1	0.8	1	1	0.03	0.04	0.4	0.1	5	1	1277.8	0.0212
50	0.5	0.1	1	1	0.03	0.04	0.4	0.5	5	1	1779.2	0.1084
50	0.6	0.01	1	1	0.03	0.04	0.4	0.4	5	1	1818.3	0.203
50	0.5	0.4	1	1	0.03	0.04	0.4	0.3	5	1	1629.6	0.0239
50	0.2	0.8	1	1	0.03	0.04	0.4	0.1	5	1	1673.5	0.0296
50	0.3	0.7	1	1	0.03	0.04	0.4	0	5	1	1798.3	0.0355
50	0.3	0.99	1	1	0.03	0.04	0.4	0.2	5	1	2240.8	0.0633
50	0.2	0.9	1	1	0.03	0.04	0.4	0.2	5	1	1607.7	0.031
50	0.8	0.9	1	1	0.03	0.04	0.4	0.1	5	1	5715.3	0.0404
50	0.4	0.9	1	1	0.03	0.04	0.4	0.1	5	1	2562	0.0595
50	0.5	0.1	1	1	0.03	0.04	0.4	0.4	5	1	1610	0.0788
50	0.3	0.8	1	1	0.03	0.04	0.4	0	5	1	2127.8	0.0497
50	0.3	0.2	1	1	0.03	0.04	0.4	0.6	5	1	1361.5	0.0422
50	0.1	0.4	1	1	0.03	0.04	0.4	0.1	5	1	916.9	0.0109
50	0.4	0.4	1	1	0.03	0.04	0.4	0.4	5	1	1370.5	0.0173
50	0.01	0.3	1	1	0.03	0.04	0.4	0.1	5	1	604.45	0.0032
50	0.1	0.9	1	1	0.03	0.04	0.4	0	5	1	1788.5	0.0575
50	0.2	0.2	1	1	0.03	0.04	0.4	0.9	5	1	1017.4	0.0188
50	0.2	0.1	1	1	0.03	0.04	0.4	0.4	5	1	1164.4	0.0443
50	0.6	0.01	1	1	0.03	0.04	0.4	0.7	5	1	1739	0.3615
50	0.2	0.2	1	1	0.03	0.04	0.4	0.4	5	1	998.89	0.0195
50	0.1	0.2	1	1	0.03	0.04	0.4	0.3	5	1	800.89	0.0089
50	0.5	0.9	1	1	0.03	0.04	0.4	0.3	5	1	2494	0.0355
50	0.2	0.1	1	1	0.03	0.04	0.4	0.3	5	1	1212.4	0.0392
50	0.8	0.99	1	1	0.03	0.04	0.4	0.5	5	1	7364.8	0.0526
50	0.3	0.3	1	1	0.03	0.04	0.4	0.2	5	1	1220	0.0211
50	0.5	0.2	1	1	0.03	0.04	0.4	0.9	5	1	1980.6	0.1203
50	0.2	0.2	1	1	0.03	0.04	0.4	0.7	5	1	1039.4	0.0199
50	0.3	0.8	1	1	0.03	0.04	0.4	0.2	5	1	1670.9	0.0273
50	0.4	0.2	1	1	0.03	0.04	0.4	0.5	5	1	1597.2	0.054
50	0.9	0.9	1	1	0.03	0.04	0.4	0.5	5	1	6609.7	0.0189
50	0.5	0.01	1	1	0.03	0.04	0.4	0.6	5	1	1691.2	0.2902
50	0.5	0.01	1	1	0.03	0.04	0.4	0.2	5	1	1595.2	0.1042
50	0.2	0.1	1	1	0.03	0.04	0.4	0	5	1	1027.1	0.0222
50	0.5	0.01	1	1	0.03	0.04	0.4	0.3	5	1	1629.5	0.1441
50	0.9	0.9	1	1	0.03	0.04	0.4	0	5	1	6247.2	0.0204
50	0.01	0.1	1	1	0.03	0.04	0.4	0.2	5	1	582.54	0.0018
50	0.2	0.2	1	1	0.03	0.04	0.4	0.1	5	1	1062.6	0.0181
50	0.5	0.01	1	1	0.03	0.04	0.4	0.4	5	1	1689.2	0.1896
50	0.1	0.1	1	1	0.03	0.04	0.4	0.4	5	1	1034.5	0.0203
50	0.5	0.2	1	1	0.03	0.04	0.4	0.4	5	1	1612.1	0.0547
50	0.3	0.1	1	1	0.03	0.04	0.4	0.3	5	1	1285.7	0.0469
50	0.1	0.6	1	1	0.03	0.04	0.4	0.1	5	1	1025.8	0.0116
50	0.9	0.9	1	1	0.03	0.04	0.4	0.9	5	1	6605.4	0.0186
50	0.1	0.5	1	1	0.03	0.04	0.4	0	5	1	1134.3	0.0204
50	0.4	0.9	1	1	0.03	0.04	0.4	0	5	1	2786.9	0.0741
50	0.2	0.6	1	1	0.03	0.04	0.4	0	5	1	1385.1	0.0255
50	0.3	0.8	1	1	0.03	0.04	0.4	0.1	5	1	2053.1	0.0372
50	0.8	0.99	1	1	0.03	0.04	0.4	0.4	5	1	7736.7	0.0571
50	0.1	0.2	1	1	0.03	0.04	0.4	0.1	5	1	886.3	0.0136
50	0.1	0.3	1	1	0.03	0.04	0.4	0.1	5	1	898.22	0.0117
50	0.9	0.9	1	1	0.03	0.04	0.4	0.4	5	1	6610.4	0.0199
50	0.5	0.01	1	1	0.03	0.04	0.4	0	5	1	1216.1	0.0324
50	0.2	0.1	1	1	0.03	0.04	0.4	0.6	5	1	1371.5	0.0622
50	0.4	0.01	1	1	0.03	0.04	0.4	0.7	5	1	1647.5	0.336
50	0.1	0.8	1	1	0.03	0.04	0.4	0	5	1	1606.7	0.0384
50	0.2	0.9	1	1	0.03	0.04	0.4	0	5	1	1972.6	0.0625
50	0.1	0.99	1	1	0.03	0.04	0.4	0.1	5	1	1882.4	0.0652
50	0.5	0.01	1	1	0.03	0.04	0.4	0.8	5	1	1617.1	0.3966
50	0.2	0.2	1	1	0.03	0.04	0.4	0.6	5	1	1073.2	0.0214
50	0.01	0.5	1	1	0.03	0.04	0.4	0	5	1	912.18	0.0107
50	0.5	0.1	1	1	0.03	0.04	0.4	0.9	5	1	1812.5	0.2009
50	0.3	0.1	1	1	0.03	0.04	0.4	0.7	5	1	1560.2	0.1093
50	0.1	0.1	1	1	0.03	0.04	0.4	0.1	5	1	916.93	0.0207
50	0.5	0.4	1	1	0.03	0.04	0.4	0.4	5	1	1590.6	0.0239
50	0.2	0.7	1	1	0.03	0.04	0.4	0	5	1	1730.4	0.0361
50	0.4	0.1	1	1	0.03	0.04	0.4	0.3	5	1	1488.9	0.0594
50	0.9	0.9	1	1	0.03	0.04	0.4	0.3	5	1	6673.9	0.0218
50	0.3	0.2	1	1	0.03	0.04	0.4	0.8	5	1	1437.7	0.052
50	0.4	0.1	1	1	0.03	0.04	0.4	0.5	5	1	1675.8	0.0937
50	0.4	0.2	1	1	0.03	0.04	0.4	0.7	5	1	1727.9	0.0722
50	0.4	0.1	1	1	0.03	0.04	0.4	0.7	5	1	1647.7	0.1291
50	0.2	0.1	1	1	0.03	0.04	0.4	0.5	5	1	1315.2	0.0543
50	0.01	0.4	1	1	0.03	0.04	0.4	0	5	1	847.96	0.0094
50	0.1	0.1	1	1	0.03	0.04	0.4	0.3	5	1	928.62	0.0179
50	0.01	0.1	1	1	0.03	0.04	0.4	0.1	5	1	737.31	0.0055
50	0.3	0.9	1	1	0.03	0.04	0.4	0	5	1	2468	0.0753
50	0.6	0.01	1	1	0.03	0.04	0.4	0.5	5	1	1795.1	0.2553
50	0.1	0.1	1	1	0.03	0.04	0.4	0.9	5	1	1043.3	0.0202
50	0.2	0.1	1	1	0.03	0.04	0.4	0.2	5	1	1147.3	0.0326
50	0.1	0.1	1	1	0.03	0.04	0.4	0.6	5	1	937.15	0.0204
50	0.2	0.4	1	1	0.03	0.04	0.4	0.2	5	1	980.11	0.0119
50	0.01	0.2	1	1	0.03	0.04	0.4	0	5	1	785.26	0.0091
50	0.2	0.99	1	1	0.03	0.04	0.4	0.1	5	1	2216.6	0.0805
50	0.8	0.99	1	1	0.03	0.04	0.4	0.3	5	1	7907	0.0662
50	0.3	0.01	1	1	0.03	0.04	0.4	0.2	5	1	1452.4	0.0991
50	0.1	0.6	1	1	0.03	0.04	0.4	0	5	1	1264.9	0.0265
50	0.1	0.1	1	1	0.03	0.04	0.4	0.2	5	1	919.17	0.0179
50	0.5	0.01	1	1	0.03	0.04	0.4	0.9	5	1	1592.5	0.4539
50	0.1	0.9	1	1	0.03	0.04	0.4	0.1	5	1	1568	0.0339
50	0.8	0.99	1	1	0.03	0.04	0.4	0.2	5	1	8062.9	0.0749
50	0.4	0.1	1	1	0.03	0.04	0.4	0.9	5	1	1729	0.177
50	0.5	0.01	1	1	0.03	0.04	0.4	0.1	5	1	1512.8	0.0633
50	0.01	0.3	1	1	0.03	0.04	0.4	0	5	1	773.12	0.0089
50	0.2	0.1	1	1	0.03	0.04	0.4	0.1	5	1	1135.6	0.0275
50	0.1	0.99	1	1	0.03	0.04	0.4	0	5	1	2115.8	0.0988
50	0.1	0.1	1	1	0.03	0.04	0.4	0	5	1	983.6	0.0179
50	0.1	0.1	1	1	0.03	0.04	0.4	0.5	5	1	1025.9	0.0228
50	0.01	0.8	1	1	0.03	0.04	0.4	0	5	1	1305.2	0.0289
50	0.3	0.1	1	1	0.03	0.04	0.4	0.8	5	1	1645.5	0.1289
50	0.1	0.1	1	1	0.03	0.04	0.4	0.8	5	1	1012.1	0.0197
50	0.4	0.1	1	1	0.03	0.04	0.4	0.8	5	1	1736.8	0.1546
50	0.4	0.5	1	1	0.03	0.04	0.4	0.4	5	1	1301	0.0153
50	0.8	0.99	1	1	0.03	0.04	0.4	0.1	5	1	8080.2	0.0813
50	0.4	0.01	1	1	0.03	0.04	0.4	0.8	5	1	1584.6	0.3819
50	0.4	0.01	1	1	0.03	0.04	0.4	0	5	1	1238.4	0.0367
50	0.1	0.1	1	1	0.03	0.04	0.4	0.7	5	1	986.43	0.0204
50	0.01	0.7	1	1	0.03	0.04	0.4	0	5	1	1218	0.0199
50	0.01	0.1	1	1	0.03	0.04	0.4	0	5	1	843.52	0.0089
50	0.7	0.01	1	1	0.03	0.04	0.4	0.7	5	1	1751.7	0.3666
50	0.3	0.01	1	1	0.03	0.04	0.4	0.9	5	1	1551.8	0.4245
50	0.3	0.1	1	1	0.03	0.04	0.4	0.6	5	1	1631.4	0.097
50	0.4	0.01	1	1	0.03	0.04	0.4	0.1	5	1	1443.8	0.0676
50	0.1	0.01	1	1	0.03	0.04	0.4	0.1	5	1	1170.8	0.0461
50	0.3	0.1	1	1	0.03	0.04	0.4	0.5	5	1	1509.9	0.0788
50	0.3	0.1	1	1	0.03	0.04	0.4	0.9	5	1	1626.8	0.1455
50	0.3	0.1	1	1	0.03	0.04	0.4	0.4	5	1	1483.3	0.0672
50	0.4	0.01	1	1	0.03	0.04	0.4	0.3	5	1	1658.5	0.1488
50	0.8	0.99	1	1	0.03	0.04	0.4	0	5	1	8751.9	0.0956
50	0.2	0.1	1	1	0.03	0.04	0.4	0.9	5	1	1455.3	0.0927
50	0.5	0.3	1	1	0.03	0.04	0.4	0.8	5	1	1929.7	0.0624
50	0.2	0.01	1	1	0.03	0.04	0.4	0	5	1	1132.6	0.0386
50	0.3	0.01	1	1	0.03	0.04	0.4	0.1	5	1	1333.7	0.0665
50	0.99	0.9	1	1	0.03	0.04	0.4	0.5	5	1	9053.8	0.0087
50	0.2	0.1	1	1	0.03	0.04	0.4	0.7	5	1	1451.2	0.0732
50	0.2	0.01	1	1	0.03	0.04	0.4	0.8	5	1	1549	0.3361
50	0.2	0.1	1	1	0.03	0.04	0.4	0.8	5	1	1463.6	0.0846
50	0.2	0.01	1	1	0.03	0.04	0.4	0.9	5	1	1514.9	0.3864
50	0.4	0.01	1	1	0.03	0.04	0.4	0.4	5	1	1707.5	0.1925
50	0.4	0.01	1	1	0.03	0.04	0.4	0.9	5	1	1575.7	0.4445
50	0.4	0.3	1	1	0.03	0.04	0.4	0.6	5	1	1473.1	0.032
50	0.01	0.01	1	1	0.03	0.04	0.4	0	5	1	1274.1	0.0205
50	0.2	0.01	1	1	0.03	0.04	0.4	0.5	5	1	1555.4	0.1964
50	0.9	0.9	1	1	0.03	0.04	0.4	0.2	5	1	6320.2	0.0185
50	0.2	0.01	1	1	0.03	0.04	0.4	0.1	5	1	1268.2	0.0618
50	0.1	0.01	1	1	0.03	0.04	0.4	0.2	5	1	1337.4	0.0687
50	0.1	0.01	1	1	0.03	0.04	0.4	0	5	1	1079.6	0.0306
50	0.4	0.01	1	1	0.03	0.04	0.4	0.2	5	1	1485.2	0.097
50	0.3	0.01	1	1	0.03	0.04	0.4	0.7	5	1	1559.5	0.3071
50	0.4	0.01	1	1	0.03	0.04	0.4	0.6	5	1	1578.4	0.2705
50	0.3	0.01	1	1	0.03	0.04	0.4	0.8	5	1	1581.2	0.365
50	0.3	0.01	1	1	0.03	0.04	0.4	0.5	5	1	1591.4	0.2169
50	0.4	0.01	1	1	0.03	0.04	0.4	0.5	5	1	1665.3	0.2353
50	0.3	0.01	1	1	0.03	0.04	0.4	0.6	5	1	1544.5	0.257
50	0.9	0.9	1	1	0.03	0.04	0.4	0.1	5	1	6590.8	0.019
50	0.3	0.01	1	1	0.03	0.04	0.4	0.3	5	1	1488.8	0.1307
50	0.01	0.9	1	1	0.03	0.04	0.4	0	5	1	1691.7	0.0532
50	0.01	0.99	1	1	0.03	0.04	0.4	0	5	1	1787.2	0.0919
50	0.1	0.01	1	1	0.03	0.04	0.4	0.3	5	1	1431.7	0.0933
50	0.2	0.01	1	1	0.03	0.04	0.4	0.2	5	1	1394.3	0.0887
50	0.4	0.2	1	1	0.03	0.04	0.4	0.8	5	1	1703.6	0.0817
50	0.99	0.9	1	1	0.03	0.04	0.4	0.7	5	1	9312.9	0.0104
50	0.2	0.01	1	1	0.03	0.04	0.4	0.3	5	1	1408.7	0.113
50	0.99	0.9	1	1	0.03	0.04	0.4	0.8	5	1	9647.1	0.0115
50	0.99	0.9	1	1	0.03	0.04	0.4	0.9	5	1	11189	0.0172
50	0.1	0.01	1	1	0.03	0.04	0.4	0.7	5	1	1572	0.2311
50	0.2	0.01	1	1	0.03	0.04	0.4	0.4	5	1	1455.4	0.1495
50	0.01	0.01	1	1	0.03	0.04	0.4	0.3	5	1	1275.6	0.0205
50	0.1	0.01	1	1	0.03	0.04	0.4	0.6	5	1	1519.5	0.1865
50	0.1	0.01	1	1	0.03	0.04	0.4	0.8	5	1	1571.8	0.2798
50	0.1	0.01	1	1	0.03	0.04	0.4	0.9	5	1	1594.3	0.3322
50	0.01	0.01	1	1	0.03	0.04	0.4	0.8	5	1	1272.1	0.0201
50	0.01	0.01	1	1	0.03	0.04	0.4	0.6	5	1	1266.1	0.0197
50	0.2	0.99	1	1	0.03	0.04	0.4	0	5	1	2296.8	0.0991
50	0.1	0.01	1	1	0.03	0.04	0.4	0.4	5	1	1524	0.1261
50	0.9	0.99	1	1	0.03	0.04	0.4	0.9	5	1	11023	0.0236
50	0.1	0.01	1	1	0.03	0.04	0.4	0.5	5	1	1547.2	0.1568
50	0.2	0.01	1	1	0.03	0.04	0.4	0.7	5	1	1560.5	0.2866
50	0.01	0.01	1	1	0.03	0.04	0.4	0.5	5	1	1279.8	0.022
50	0.01	0.01	1	1	0.03	0.04	0.4	0.9	5	1	1273.1	0.0194
50	0.01	0.01	1	1	0.03	0.04	0.4	0.4	5	1	1326.5	0.0217
50	0.5	0.01	1	1	0.03	0.04	0.4	0.5	5	1	1724.1	0.2448
50	0.6	0.01	1	1	0.03	0.04	0.4	0.3	5	1	1743.5	0.1472
50	0.9	0.99	1	1	0.03	0.04	0.4	0.8	5	1	12442	0.0304
50	0.01	0.01	1	1	0.03	0.04	0.4	0.1	5	1	1315.2	0.0192
50	0.9	0.99	1	1	0.03	0.04	0.4	0.7	5	1	12686	0.033
50	0.01	0.01	1	1	0.03	0.04	0.4	0.7	5	1	1231.3	0.0186
50	0.9	0.99	1	1	0.03	0.04	0.4	0.5	5	1	12911	0.0378
50	0.9	0.99	1	1	0.03	0.04	0.4	0.6	5	1	13338	0.0381
50	0.9	0.99	1	1	0.03	0.04	0.4	0	5	1	16074	0.0682
50	0.9	0.99	1	1	0.03	0.04	0.4	0.4	5	1	13857	0.0446
50	0.9	0.99	1	1	0.03	0.04	0.4	0.3	5	1	14330	0.0516
50	0.2	0.01	1	1	0.03	0.04	0.4	0.6	5	1	1575	0.2421
50	0.9	0.99	1	1	0.03	0.04	0.4	0.1	5	1	14521	0.0586
50	0.9	0.99	1	1	0.03	0.04	0.4	0.2	5	1	14567	0.0558
50	0.01	0.01	1	1	0.03	0.04	0.4	0.2	5	1	1305.1	0.0195
50	0.99	0.99	1	1	0.03	0.04	0.4	0.7	5	1	60860	0.0185
50	0.99	0.99	1	1	0.03	0.04	0.4	0.9	5	1	65838	0.022
50	0.99	0.99	1	1	0.03	0.04	0.4	0.8	5	1	63705	0.0214
50	0.99	0.99	1	1	0.03	0.04	0.4	0.6	5	1	61722	0.0222
50	0.6	0.3	1	1	0.03	0.04	0.4	0.7	5	1	1379.8	0.07
50	0.8	0.4	1	1	0.03	0.04	0.4	0.8	5	1	2012.8	0.03
50	0.99	0.5	1	1	0.03	0.04	0.4	0.8	5	1	1869.6	0.03
50	0.99	0.99	1	1	0.03	0.04	0.4	0	5	1	31817	0.01
50	0.99	0.99	1	1	0.03	0.04	0.4	0.1	5	1	41909	0
50	0.99	0.99	1	1	0.03	0.04	0.4	0.2	5	1	1.1777e+05	0
50	0.99	0.99	1	1	0.03	0.04	0.4	0.3	5	1	52941	0
50	0.99	0.99	1	1	0.03	0.04	0.4	0.4	5	1	92638	0.02
50	0.99	0.99	1	1	0.03	0.04	0.4	0.5	5	1	73123	0.03
